1 **Auxiliary subunits keep AMPA receptors compact during activation and**  
2 **desensitization**

3

4 Jelena Baranovic and Andrew J.R. Plested<sup>1§</sup>

5

6 Institute of Biology, Cellular Biophysics, Humboldt Universität zu Berlin, 10115  
7 Berlin; Leibniz Forschungsinstitut für Molekulare Pharmakologie (FMP), 13125  
8 Berlin; NeuroCure, Charité Universitätsmedizin, 10117 Berlin, Germany.

9

10 <sup>1</sup>Lead Contact

11 <sup>§</sup>To whom correspondence should be addressed: [plested@fmp-berlin.de](mailto:plested@fmp-berlin.de)

## 12 **Summary**

13 Signal transduction at vertebrate excitatory synapses involves the activity of ionotropic  
14 glutamate receptors, including the AMPA ( $\alpha$ -amino-3-hydroxy-5-methyl-4-isoxazole  
15 propionate) receptor. Technical advances in cryo-electron microscopy have brought a  
16 slew of full-length structures of AMPA receptors, on their own and in combination with  
17 auxiliary subunits. These structures illustrate a wide range of conformations, indicating  
18 that individual domains might undergo substantial lateral motions during gating,  
19 resulting in an open, “relaxed” extracellular layer. Here, we used bifunctional  
20 methanethiosulfonate cross-linkers to calibrate the conformations found in functional  
21 AMPA receptors both in the presence and absence of the auxiliary subunit Stargazin.  
22 Our data indicate that AMPA receptors have considerable conformational freedom and  
23 can get trapped in stable, relaxed conformations, especially upon long exposures to  
24 glutamate. In contrast, Stargazin limits this conformational flexibility. Thus, under  
25 synaptic conditions, where brief glutamate exposures and the presence of Stargazin  
26 dominate, AMPA receptors are unlikely to adopt very relaxed conformations during  
27 gating.

## 28 **Introduction**

29 AMPA-type glutamate receptors are found at excitatory synapses throughout the  
30 mammalian brain, where they convert glutamate release into membrane  
31 depolarisation. Their fast kinetics (Colquhoun et al., 1992; Geiger et al., 1995;  
32 Taschenberger and von Gersdorff, 2000), as well as the physical attributes of  
33 synapses (Xu-Friedman and Regehr, 2003), allow them to follow glutamate transients  
34 at rates above 100 Hz. However, the structural dynamics underlying their rapid  
35 signalling are unclear. AMPA receptors are tetrameric ligand-gated ion channels with  
36 unique architectural features and loosely coupled structural domains: unstructured  
37 linkers connect the amino- and ligand-binding domains (ATDs and LBDs, respectively)  
38 forming the extracellular part of the receptor. The LBDs are in turn connected to the  
39 transmembrane region (TM) that harbors the integral ion channel (Figure 1A). The  
40 extracellular domains adopt local dimer pairs in resting and active receptors. The LBD  
41 dimers 'break up' in the desensitized state (Sun et al., 2002; Armstrong et al., 2006;  
42 Dürr et al., 2014; Twomey et al., 2017b), but motions of the ATDs are unclear  
43 (Herguedas et al., 2016; Cais et al., 2014; Yelshanskaya et al., 2016) (Shaikh et al.,  
44 2016).

45

46 The crowded and narrow synaptic cleft is scarcely wider than the receptors are tall  
47 themselves and has narrow edges (Zuber et al., 2005; Tao et al., 2018). This  
48 observation implies that conformational dynamics of the receptor domains and their  
49 relation to synapse dimensions and molecular composition has implications in both  
50 health and disease. For example, if extremely dilated conformations of AMPA  
51 receptors can be adopted rapidly, that is on the millisecond timescale of fast excitatory  
52 transmission, this could impact receptor anchoring at synapses. Activity-dependent  
53 anchoring might be a way to regulate synaptic strength (Constals et al., 2015). On the  
54 other hand, slow rearrangements could be relevant for trafficking, and in disease  
55 states.

56

57 Advances in the structural biology of ionotropic glutamate receptors (iGluRs) have  
58 produced a catalogue of static conformational snapshots. Very similar structures have  
59 been obtained in conditions corresponding to nominally different functional states

60 (Chen et al., 2014; Dürr et al., 2014; Yelshanskaya et al., 2014). In addition, several  
61 structures suggest substantial movements of the extracellular domains when bound  
62 by agonist (Nakagawa et al., 2005; Dürr et al., 2014; Meyerson et al., 2014). In these  
63 structures, the domains “fall apart”, either breaking local symmetry states, adopting  
64 higher order symmetries or switching into a ring-like arrangement (Figure 1A). The  
65 timescale of this broad range of potential lateral movements is unknown, because the  
66 structural experiments necessarily took place over hours. We therefore set out to  
67 investigate the conformational range of agonist bound AMPA receptors with the aim  
68 of distinguishing frequently-visited, short-lived conformations from the long-lived ones  
69 that likely have less direct relevance to synaptic transmission.

70

71 Previously, we demonstrated disulphide bonds and metal bridges trapping receptors  
72 in compact LBD arrangements (Salazar et al., 2017; Baranovic et al., 2016; Lau et al.,  
73 2013). To measure the separation of domains in this work, we used bifunctional  
74 methanethiosulfonate cross-linkers (bis-MTS) of defined lengths (Loo and Clarke,  
75 2001; Guan et al., 2002; Armstrong et al., 2006; Tajima et al., 2016) (Figure 1D).  
76 These cross-linkers show specific combination with two free thiol groups, provided by  
77 cysteine residues that we engineered. The reactivity of these probes can in principle  
78 report distances, giving them the property of nanometre-scale molecular rulers.

79

80 Overall, our results suggest that the more dilated conformation of the receptor, the  
81 slower it is to access, but once attained, these conformations are stable. However,  
82 auxiliary subunits restrict the conformational ensemble, maintaining more compact  
83 arrangements. This kinetic classification suggests AMPA receptors at synapses have  
84 similar, compact geometries regardless of their instantaneous gating state.

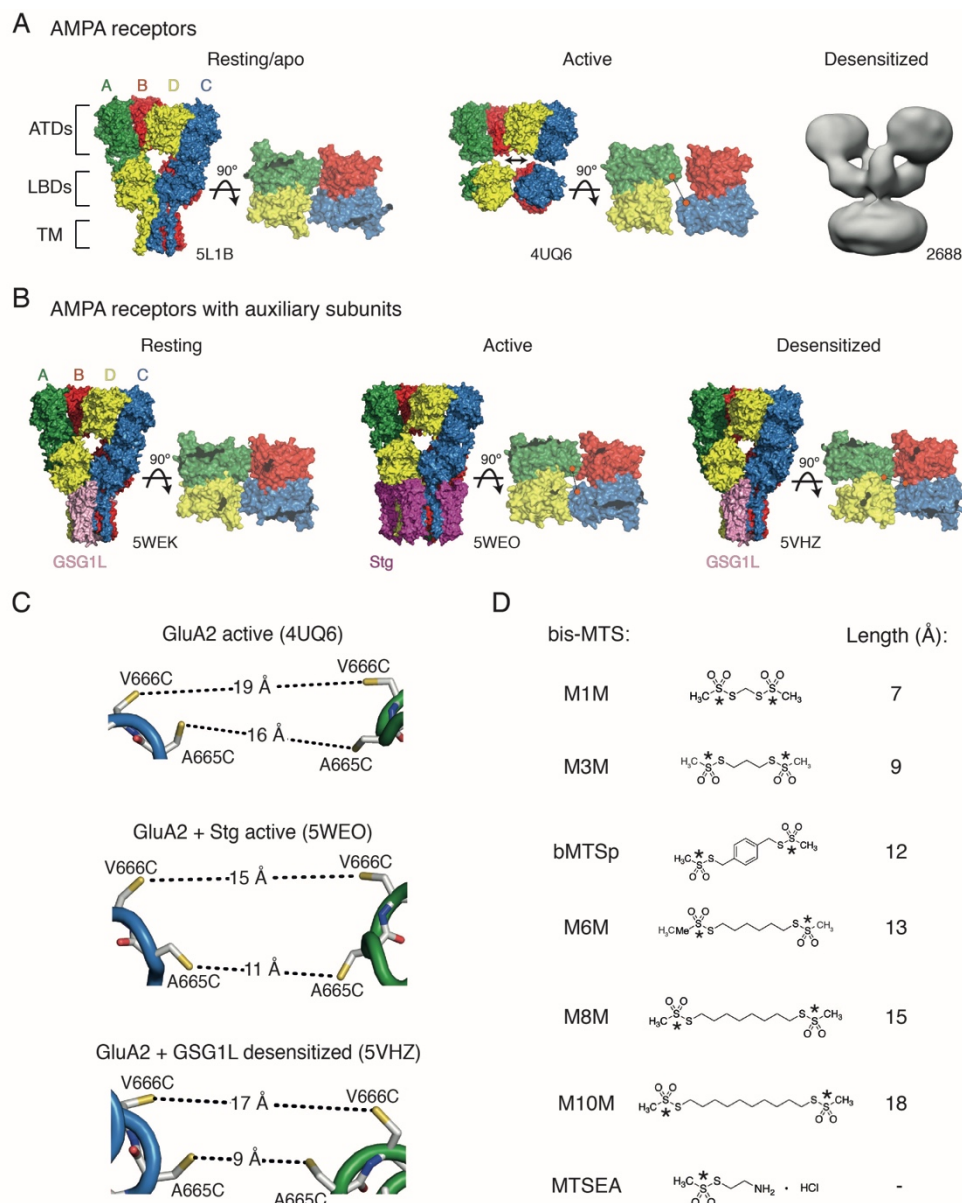

85

86 **Figure 1 Geometry of AMPA receptors.** (A) Structural models of full-length AMPA receptors in resting, active  
87 and desensitized states. Accession codes for PDB or EMDB are indicated. Subunits are colour-coded: A – green,  
88 B – red, C – blue and D – yellow. Square brackets delineate AMPA receptor domains: ATDs – amino terminal  
89 domains, LBDs – ligand binding domains and TM – transmembrane region. The cytoplasmic domain is not  
90 resolved. For the resting and active structures, LBDs are also shown in a top-down view (omitted for the  
91 desensitized structure due to its low resolution). Orange spheres connected by black lines indicate 665-666  
92 residues (mutated in this study) in the LBD layer. (B) Same as in (A), but for GluA2 structures complexed with  
93 auxiliary subunits: Stg – Stargazin (dark purple) and GSG1L (light purple). (C) Distances between sulfhydryl groups  
94 of mutated residues, A665C and V666C, in agonist-bound structures shown in (A) and (B). (D) Structures of  
95 bifunctional (bis-MTS: M1M-M10M) and monofunctional (MTSEA) compounds. Lengths were measured between  
96 reactive sulphur atoms (SG, asterisks).

## 97 **Results**

98

### 99 **Desensitized AMPA receptors can adopt ‘relaxed’ conformations**

100 The rupture of the LBD intra-dimer interface is a structural hallmark of AMPA receptor  
101 desensitization, as shown by biophysical studies based on the structures of isolated  
102 dimers of ligand binding domains (Sun et al., 2002; Armstrong et al., 2006). Some  
103 cryo-electron microscopy (cryo-EM) structures of full-length receptors suggest that  
104 desensitization might involve further rearrangements of the ligand-binding domains,  
105 including separation of the two dimers and ‘dilation’ of the entire extracellular layer in  
106 the membrane plane (Figure 1A).

107

108 We attempted to capture this movement between LBDs with bis-MTS cross-linkers  
109 ranging from 7 to 18 Å in length (Figure 1D). If the LBD layer opened up in the  
110 horizontal plane upon receptor desensitization, this movement should create access  
111 for longer bis-MTS cross-linkers in the inter-dimer space (orange dots in Figure 1A).  
112 The same principle applies to the ATDs, but ATD layer is functionally silent  
113 (Pasternack et al., 2002) and its cross-linking does not produce measurable changes  
114 in the receptor activity (Yelshanskaya et al., 2016). Structural models and  
115 fluorescence studies (Shaikh et al., 2016) so far indicate that the ATDs follow  
116 movements of the LBD layer (Figure 1A-B). We assume here that the membrane-  
117 bound TM region strongly restricts vertical displacement of the LBDs, that is, the  
118 movements we are probing are those approximately parallel to the membrane.

119

120 We identified positions 665 and 666 (in the FG loop) in homomeric GluA2 receptors  
121 as best positioned to follow separation of the LBD dimers (Figure 1A-C). The  
122 presumptive geometries of the sulfhydryl groups (SG) for cysteine mutants at these  
123 sites, in the agonist bound states of GluA2 receptor (with and without auxiliary  
124 subunits) are shown in Figure 1C. The structure of the desensitized GluA2 receptor  
125 (EMDB: 2688, Figure 1A) is not detailed enough to measure residue distances, but  
126 the equivalent residues are 21 Å apart in homologous kainate receptors (PDB: 5KUF;  
127 (Meyerson et al., 2016)).

128

129 As shown in Figure 2B and D, bis-MTS cross-linkers M1M to M10M all caused strong  
130 reduction of the peak current in V666C mutant when applied in the desensitized state.  
131 To quantify this effect, the peak current was measured from the control pulses before  
132 ( $I_{\text{peak}}$  pre-trap, 4 pulses) and after the 1-minute application (trap) of the cross-linker  
133 ( $I_{\text{peak}}$  post-trap, 2nd control pulse after the trap, arrows in Figure 2A-C). For each patch,  
134 the ratio of  $I_{\text{peak}}$  post-trap over  $I_{\text{peak}}$  pre-trap was determined and plotted as shown in  
135 Figure 2D-E.

136

137 For the V666C mutant, bis-MTS cross-linkers from 7 to 15 Å in length (M1M-M8M; 1  
138  $\mu\text{M}$ ), inhibited about 90% of the peak current in the patch after a 1-minute application  
139 (see Table S1). The longest (M10M) cross-linker was the slowest one to act (Figure  
140 2F), leading to slightly less inhibition (~70%) in the first minute of exposure. The  
141 reduction was less pronounced for A665C mutant for all cross-linkers (~50%, Figure  
142 2E and Table S1).

143

144 Is the slow action of bis-MTS cross-linkers ( $\leq$  minute, Figure 2F) because we are  
145 sampling slowly-attained conformations? We used low concentrations (1  $\mu\text{M}$ ) of MTS  
146 reagents to ensure bifunctional reagents were not chaining to each other. To  
147 determine that modification of the V666C receptors by MTS cross-linkers can proceed  
148 on the same time scale as receptor gating we performed additional trapping  
149 experiments with 50  $\mu\text{M}$  M3M and M10M (Figure 3). Indeed, at 50  $\mu\text{M}$ , both bis-MTS  
150 cross-linkers were roughly 50x faster to modify the receptors ( $\tau_{\text{M3M}} = 0.2$  s and  $\tau_{\text{M10M}}$   
151  $= 1.7$  s, Figure 3B and D). The relative modification time was preserved with the longer  
152 cross-linker (M10M) still being slower than the shorter one (M3M). These experiments  
153 indicate that bifunctional MTS reagents are capturing rapid transitions in receptor  
154 structure on the millisecond timescale.

155

156 Inhibition was overall so profound that we sought to establish that it was specific. Two  
157 other factors potentially contribute to the current decrease: non-specific run-down of  
158 the current and disulphide bonding of the introduced cysteines to each other. Current  
159 run-down is particularly difficult to avoid in the long records that we made for these  
160 experiments. A665C and V666C sulfhydryl groups were both previously shown to

161 crosslink in the presence of oxidizing agent CuPhen (Salazar et al., 2017; Lau et al.,  
162 2013; Yelshanskaya et al., 2016). To account for these confounding factors, we made  
163 paired recordings: a patch was first exposed to a 1-minute long trapping pulse  
164 containing glutamate only (no cross-linkers), followed by trapping of the same patch  
165 in glutamate and a cross-linker (Figure 2B-C). Any run-down in the patch or possible  
166 cross-linking of the cysteines to each other was then assessed from trapping in  
167 glutamate only. Both mutants underwent some peak current reduction in glutamate in  
168 the absence of cross-linker (A665C:  $0.62 \pm 0.04$ ,  $n = 23$ ,  $P < 10^{-7}$  vs. WT, V666C:  $0.86$   
169  $\pm 0.02$ ,  $n = 44$ ,  $P = 0.003$  vs. WT; WT:  $0.97 \pm 0.03$ ,  $n = 30$ ), consistent with previous  
170 results (Lau et al., 2013; Yelshanskaya et al., 2016). Limited cross-linking of A665C  
171 cysteines to each other in long exposures to 10 mM glutamate was evident as a  
172 recovery of peak responses after the trapping pulse (grey dots in Figure 2C,  $\tau = 3.3 \pm$   
173  $0.4$  s,  $n = 17$ ). For the V666C mutant, all 6 bis-MTS cross-linkers (M1M-M10) resulted  
174 in more current inhibition than glutamate alone ( $P \leq 0.03$  with and without bis-MTS,  
175 depending on the cross-linker; paired randomisation test). Overall, paired recordings  
176 gave indistinguishable results to the non-paired recordings. In other words, disulphide  
177 crosslinking and rundown were minimal in these conditions. Therefore, we pooled the  
178 cross-linking data in glutamate alone across conditions for each mutant (Figure 2D-  
179 E).

180  
181 To confirm that the observed peak current reduction came from crosslinking rather  
182 than monofunctional engagement of a cross-linker, we modified mutants with MTSEA  
183 (Figure 1D), which can interact only with a single cysteine. As shown in Figure 2D-E,  
184 MTSEA failed to inhibit either V666C or A665C above control ( $I_{\text{peak post-trap}} / I_{\text{peak pre-}}$   
185  $\text{trap}$  for V666C:  $0.89 \pm 0.025$ ,  $n = 3-4$ ,  $P = 0.1$ ; for A665C:  $0.81 \pm 0.06$ ,  $n = 3-4$ ,  $P =$   
186  $0.8$ ). This result also suggests that the mild oxidizing environment created by MTS  
187 compounds at 1  $\mu\text{M}$  has little tendency to promote disulphide bond formation. Thus,  
188 bifunctional MTS cross-linking was necessary for the peak current reduction observed  
189 in desensitizing AMPA receptors.

190  
191 The effect of all bis-MTS cross-linkers with respect to their length is summarized in the  
192 trapping profile for desensitized V666C receptors (Figure 2G). Rather than showing a



193 preferred cross-linking length (and thus, conformation) for desensitized receptors, the  
194 profile is a shallow parabola with strong effects across all tested lengths. Fitting a  
195 parabola to these data is justified by the observation that direct disulfide crosslinking  
196 (representing the short distance limit) is quite ineffective at this site (Figure 2D and  
197 (Lau et al., 2013)). These results demonstrate that desensitized AMPA receptors can  
198 ‘open up’ their LBD layer to  $\sim 18$  Å at position 666 during desensitization and occupy  
199 a spectrum of conformations. Structural heterogeneity and ‘dilation’ of the LBD layer  
200 to  $\geq 18$  Å are both in good agreement with cryo-EM structures (Meyerson et al., 2014;  
201 Dürr et al., 2014).

202

203 In addition to positions 665 and 666, we also tested nearby positions 662 and 664 for  
204 their sensitivity to bis-MTS cross-linkers (Figure S1). The I664C mutant showed similar  
205 levels of the peak current reduction to V666C. However, we judged the I664C  
206 sulfhydryls were too far apart to make effective use of the available bis-MTS cross-  
207 linkers (Figure S1A). Like the A665C mutant, the S662C mutant showed considerable  
208 disulphide formation, so we focused on the V666C mutant in further investigations.

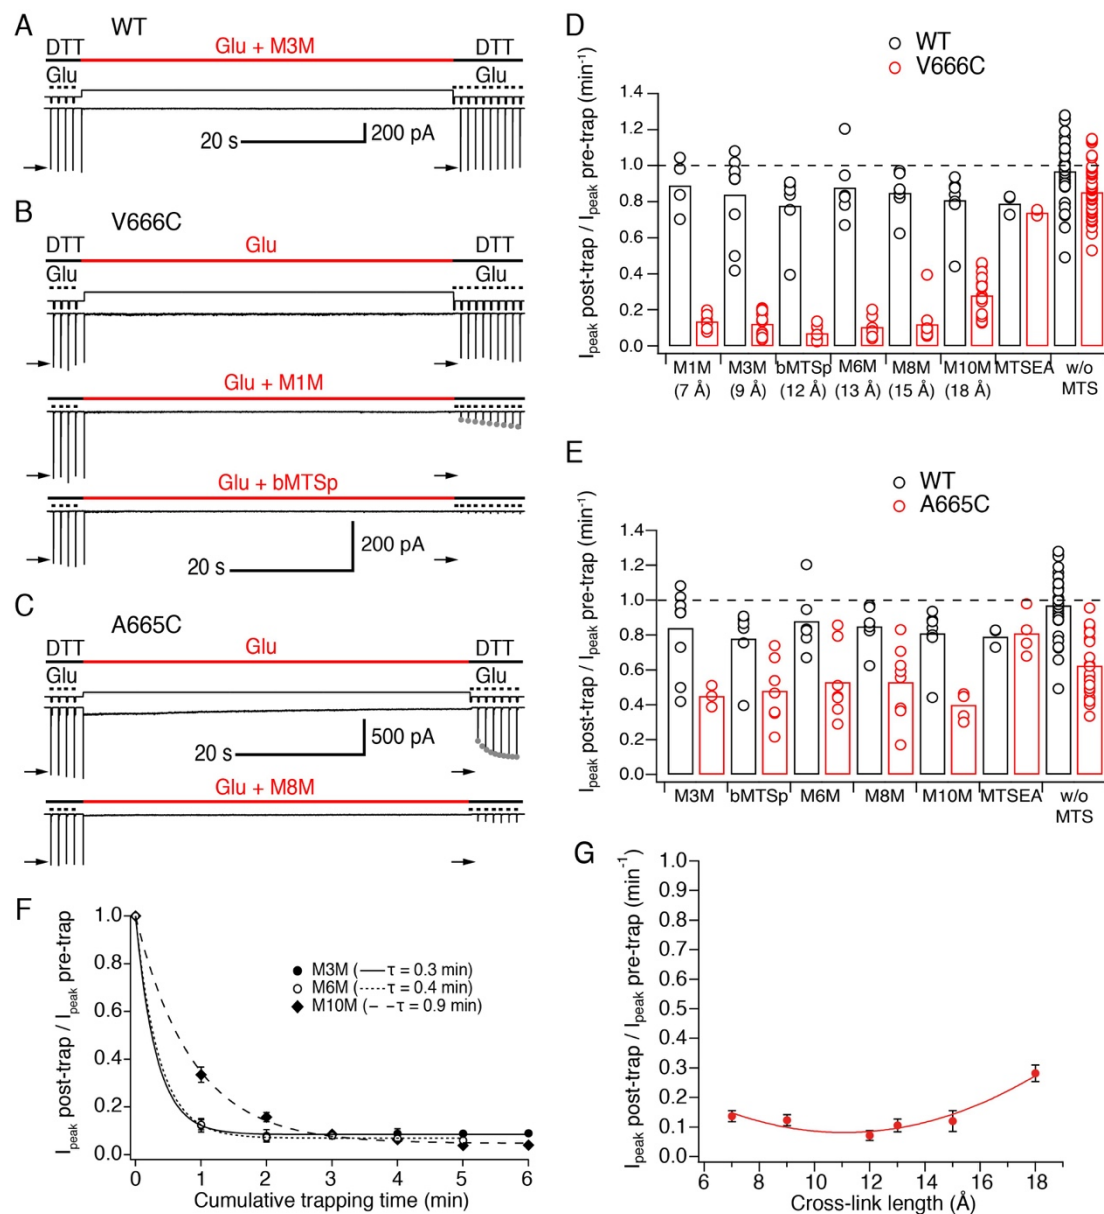

209

210

211

212

213

214

215

216

217

218

219

220

221

222

223

**Figure 2 LBDs can separate  $\geq 18$  Å in desensitized GluA2.** (A) Control recording of wild-type (WT) GluA2 receptors in response to a trapping protocol. Movements of the piezo reflecting the solution exchange are shown in thin, black lines above the current trace. Composition of the solutions is indicated in thick lines above the piezo trace. Downward ticks are 200 ms control jumps from DTT (1 mM) to DTT and glutamate (Glu, 10 mM). Four pre-trap control pulses were followed by a 1-minute long trapping pulse (red line) in Glu (10 mM) and M3M (1  $\mu$ M). After the trapping pulse, the patch was exposed to 10 post-trap control pulses. The first post-trap pulse gives no response because receptors are desensitized (for details, see Experimental Procedures). (B) Same as in (A), but for V666C mutant. The top two recordings are from the same patch: in the first trace, V666C receptors were exposed only to Glu. Trapping of the same patch in Glu and M1M (1  $\mu$ M), results in pronounced peak current reduction, which partly recovered with  $\tau_{\text{recovery}} = 30 \pm 7$  s,  $n = 5$  (grey dots; post-trap control pulses extended to 30 for fit). The bottom trace is a different patch trapped in bMTSp (1  $\mu$ M), showing even stronger peak current reduction without any recovery. (C) As in (B) but for the A665C mutant. The two traces are paired recordings of the same patch. Post-trap control pulses show that A665C does cross-link to itself, but most of the current recovers within several seconds after the trap (grey dots;  $\tau_{\text{recovery}} = 3.3 \pm 0.4$  s,  $n = 17$ ). If the same patch is now trapped in Glu

224 and M8M (1  $\mu$ M), the peak current reduction is much more pronounced and does not recover. (D) Summary of the  
225 trapping effects for WT (black) and V666C (red) for cross-linkers M1M (7 Å) to M10M (18 Å). Trapping effect was  
226 calculated as the ratio of the post-trap and pre-trap peak current (arrows in A-C). MTSEA is a monofunctional  
227 reagent and “w/o MTS” stands for “without MTS” (traps in Glu only, pooled for all experiments). Dashed line  
228 indicates no effect. For peak current reduction in a bis-MTS vs. w/o MTS (pooled),  $P < 10^{-7}$ , for all cross-linkers.  
229 (E) Same as in (D), but for A665C (red) in cross-linkers M3M (9 Å) to M10M (18 Å). A665C mutant in the presence  
230 and absence of an MTS cross-linker resulted in  $P \leq 0.02$ , depending on the cross-linker. For statistics vs. WT and  
231 between different bis-MTS, see Table S1. (F) Trapping time for V666C receptors in M3M, M6M and M10M. The 1-  
232 min trapping protocol was repeated up to 6 times, resulting in a cumulative exposure of the patch to a bis-MTS of  
233 up to 6 min. The data were fit with a monoexponential for each cross-linker ( $\tau$  indicated in brackets). (G) Trapping  
234 profile of desensitized V666C receptors shows the effect of each cross-linker vs. its length, in the first minute of  
235 exposure. The data were fit with a parabola (red line):  $f(x) = K_0 + K_1 \cdot (x - K_2)^2$  (for details, see Experimental  
236 Procedures).

237 Next, we wanted to test how specific the cross-linkers were in targeting the inter-dimer  
238 interface of the LBD layer in our conditions. We generated another single cysteine  
239 mutant, K493C (Armstrong et al., 2006), positioned within LBD dimers (Figure S2A).  
240 Thus, bridging across the two cysteines should keep the LBD dimers intact leading to  
241 block of desensitization. When we applied bis-MTS cross-linkers on K493C receptors  
242 (1  $\mu$ M, for  $\geq 1$  min), the effects were profoundly different from the mutants at the inter-  
243 dimer interface: K493C current underwent potentiation rather than inhibition, with  
244 shorter cross-linkers (M1M, M3M and M6M) blocking the receptor desensitization  
245 almost completely (Figure S2B-D). We also considered the possibility that bis-MTS  
246 cross-linkers might be spuriously cross-linking to wild-type cysteines on the receptor  
247 or forming inter-receptor cross-links (Figure S3A). If this were the case, the peak  
248 current reduction effect would be expected to scale with the number of the receptors  
249 in the membrane (i.e. peak current), but no such correlation was found (Figure S3B).  
250 In addition, longer cross-linkers would be expected to be more efficient in forging inter-  
251 receptor cross-links, but we found that the longest cross-linker, M10M, was the slowest  
252 to react on desensitized AMPA receptors (Figure 2F). The absence of the strong peak  
253 current reduction in the WT receptors also speaks against the bis-MTS cross-linkers  
254 interacting with native cysteine residues. These results led us to conclude that the bis-  
255 MTS cross-linkers are cross-linking cysteines introduced at the LBD inter-dimer  
256 interface (V666C).

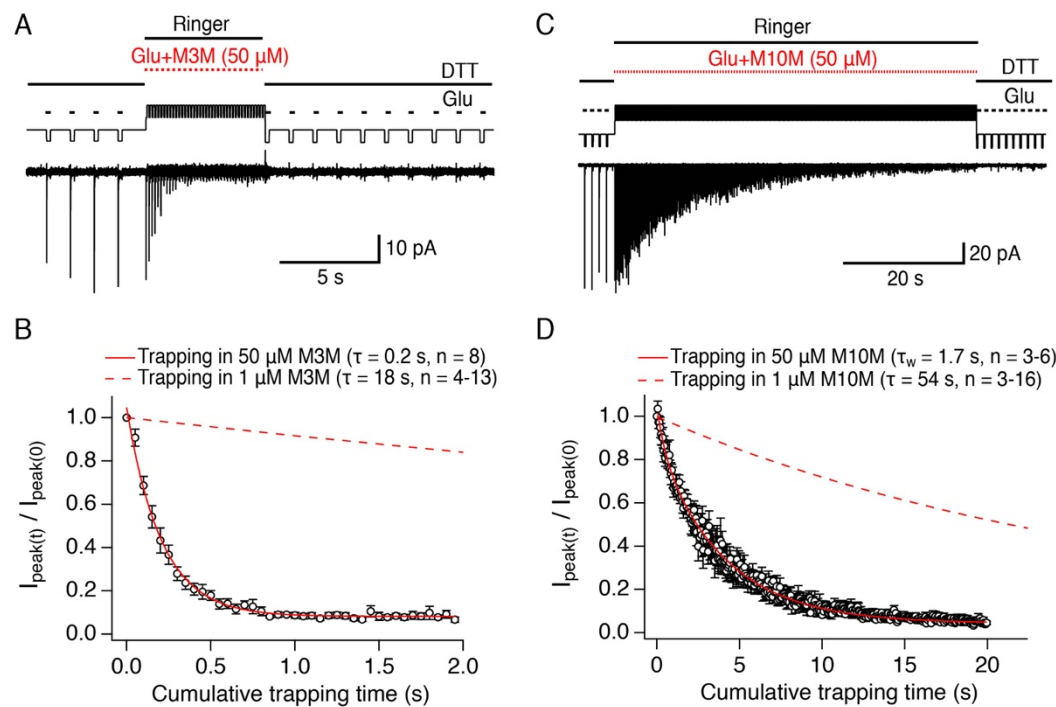

257

258 **Figure 3 Bis-MTS cross-linkers can trap at millisecond timescale.** (A) Trapping protocol for V666C receptors  
 259 in 50 μM M3M and 10 mM glutamate (Glu), same as in Figure 2A-C, but with a trapping jump consisting of 50 ms-  
 260 pulses into 50 μM M3M and 10 mM Glu at 6.7 Hz (thick, red lines), interspersed with 100 ms intervals in Ringer  
 261 solution. (B) Progression of the peak current reduction in response to the trapping pulses (red in (A)) was  
 262 determined for each patch, normalized to the first pulse, averaged across patches and plotted. The resulting  
 263 decrease in the peak current was fit with a monoexponential (red line) with  $\tau = 0.2$  s. Dashed line is a fit to trapping  
 264 in 1 μM M3M from Figure 2F. (C) As in (A), but for M10M, with the trapping jump prolonged to 1 minute to complete  
 265 the peak current reduction. (D) As in (B), but for M10M. Peak current decay was best fit with a double exponential  
 266 resulting in weighted  $\tau_w$  of 1.7 s.

## 267 **Cross-linked desensitized states are highly stable**

268 Upon establishing specific and strong reduction of the peak current in desensitizing  
 269 V666C receptors by the bis-MTS cross-linkers, we next sought to examine the stability  
 270 of trapped states. The more stable the trapped state, the longer we would expect that  
 271 it takes for trapping effects to reverse, and vice versa. The fastest recovery after  
 272 trapping was observed with M1M ( $\tau = 30 \pm 7$  s,  $n = 5$ ) and the time constant of the  
 273 peak current recovery could be measured by directly fitting the peak current of the  
 274 post-trap control pulses (grey dots in Figure 2B). With longer bis-MTS cross-linkers,  
 275 the recovery time increased to minutes, making direct measurements of the recovery  
 276 time from post-trap control pulses impractical. Instead, the experimental design was  
 277 adjusted to allow measurements of long recovery times as described in Experimental  
 278 Procedures and Figure 4. After the receptors were trapped with M3M for 1 minute, the

279 peak current in the patch did recover, but very slowly, taking over 10 minutes (600  
280 applications of glutamate) to reach the pre-trapping levels. With longer cross-linkers,  
281 the peak current was essentially irreversible over the timescales we could measure  
282 (20 minutes; Figure 4D-G). The progressive inability of the receptors to recover from  
283 trapping with longer cross-linkers indicates increasingly stable trapped states  
284 corresponding to greater separation of the A and C subunits in the desensitized state  
285 (Figure 4G-H). Desensitized AMPA receptors with a disulphide bridge formed between  
286 the two V666C residues at inter-dimer interface fit in well with this trend, recovering in  
287 seconds following 100 s exposure to the oxidizing agent CuPhen (A.P. and Hector  
288 Salazar, unpublished data) (Figure 4H).

289

290 To ensure that the lack of recovery was not due to a limited reducing capacity, we  
291 tested a higher concentration of the reducing agent DTT (5 mM instead of 1 mM).  
292 Stronger reducing conditions did not consistently promote recovery of V666C  
293 receptors trapped by a long cross-linker M6M (12 Å;  $P = 0.3$ , Figure S4).

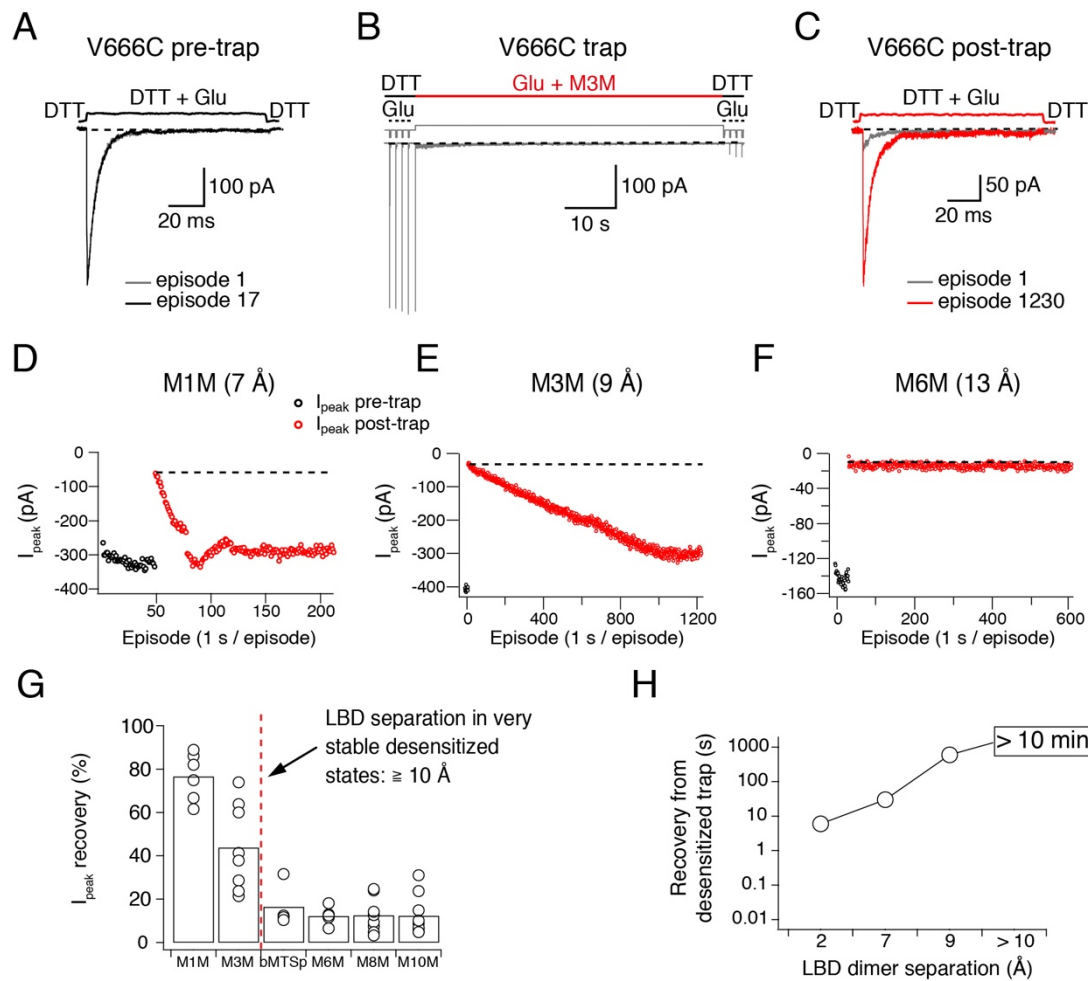

294

295 **Figure 4 Recovery of trapped desensitized V666C receptors depends on the LBD separation.** (A) Protocol  
 296 to measure recovery from trapping. To obtain a stable baseline response to glutamate, we first repeated brief  
 297 glutamate applications in reducing conditions (1 mM DTT). In the given example, we gave 17 pulses (100 ms, 1  
 298 Hz). (B) In the following step, the patch was exposed to 1  $\mu$ M cross-linker (here M3M) and 10 mM Glu for 1 minute,  
 299 with control pulses before and after the trap. (C) After the trapping protocol, the patch was again exposed to fast,  
 300 reducing glutamate jumps like in (A) in order to follow recovery of the response. In this example, we could record  
 301 1230 consecutive episodes ( $\sim$ 20 min) and obtain almost complete recovery. Note the difference between the  
 302 current amplitude in the 1<sup>st</sup> episode (grey) and the 1230<sup>th</sup> episode (red). The recovery of the patch current ( $I_{peak}$ ) in  
 303 typical experiments for different cross-linkers is plotted in panels D - F (panel E is the same patch as in panels A -  
 304 C). Black dots show the responses before the trap and red dots the peak current after the trap. The gap in red dots  
 305 in (D) represents a switch between recording protocols. (G) Summary of the peak current recovery for different  
 306 cross-linkers. The percentage of recovered current is the ratio of the peak currents recorded 3-10 min after the trap  
 307 to the peak current before trapping. Dashed, red line denotes a limit after which no recovery of the current could  
 308 be measured within 10 min after the trap. (H) Plot of recovery time from trapped desensitized states vs. the inter-  
 309 dimer separation at position V666C in the LBD layer. The first data point indicates recovery from V666C disulphide  
 310 bridges formed in desensitized state (A. P. and Hector Salazar, unpublished data).

### 311 **Activation limits conformational heterogeneity of the LBD layer**

312 We next investigated if the LBDs of activated V666C receptors are also accessible to  
313 a similarly wide range of bis-MTS cross-linkers. According to one cryo-EM structure of  
314 an apparently activated AMPA receptor (Meyerson et al., 2014) (Figure 1C), V666C  
315 residues should be far enough apart to accommodate cross-linkers up to 19 Å in  
316 length.

317

318 To maintain the active state, we blocked desensitization with cyclothiazide (CTZ, 100  
319 μM). As shown in Figure 5, block of desensitization reduced inhibition by bis-MTS  
320 cross-linkers in the first minute of exposure (see Table S2 for statistics). Current  
321 inhibition for every cross-linker in the presence and absence of desensitization is  
322 shown in Figure 5B. With M1M, about 15% of V666C receptors recovered from  
323 inhibition with a time constant of  $\tau = 7.1 \pm 1$  s,  $n = 4$ , leading to the final inhibition of  
324  $0.65 \pm 0.02$ ,  $n = 12$  (not shown). For M3M, the recovery was still faster with  $\tau = 1.98 \pm$   
325  $0.2$  s,  $n = 8$  (grey dots in Figure 5A), with about 15% the receptors recovering and  
326 leading to the final inhibition of  $0.53 \pm 0.03$ ,  $n = 9$ . The fast recovery indicates that with  
327 dimer separation of about 9 Å, receptors were trapped in an unstable,  
328 stereochemically-strained state. Notably, the SG of V666C are 9 Å apart in a structure  
329 solved with the partial agonist NOW, which may represent a pre-open state  
330 (Yelshanskaya et al., 2014).

331

332 With desensitization blocked, AMPA receptors displayed a distinct trapping profile  
333 from that of desensitized receptors (Figure 5C). The sharper trapping profile could not  
334 be described by a parabola and indicated a favored LBD separation of 15 Å, greater  
335 than the shallow optimum of desensitized receptors (11 Å). Because inhibition was  
336 less profound than in desensitized receptors for all cross-linkers except M8M, we  
337 investigated the possibility that bis-MTS modifies non-desensitizing V666C receptors  
338 in other ways than current amplitude reduction. We measured the rate of receptor  
339 deactivation before and after the trap in M10M in the presence of CTZ and found no  
340 difference (Figure S5C-D,  $\tau_{\text{pre-trap}} = 1.7$  ms  $\pm$  0.2,  $\tau_{\text{post-trap}} = 1.6 \pm 0.2$  ms,  $n = 8$ ,  $P =$   
341 0.05 (paired randomisation test)). We considered the possibility that non-desensitizing  
342 receptors were silently modified by M10M. We tested this scenario with the following

343 experiment: a patch with V666C receptors was first trapped in M10M and CTZ; CTZ  
344 was then washed-out the patch and freely desensitizing V666C receptors were  
345 exposed to M10M only (Figure S5A). If non-desensitizing V666C receptors had been  
346 silently modified by M10M, then a fraction of the receptors should have been protected  
347 resulting in the reduced sensitivity to further trapping by M10M. V666C receptors  
348 initially exposed to M10M in the presence of CTZ were modified to the same extent as  
349 naïve receptors by M10M once CTZ was unbound ( $I_{\text{peak post-trap}} / I_{\text{peak pre-trap}}$  for  
350 V666C initially trapped in CTZ:  $0.23 \pm 0.04$ ,  $n = 6$  and for V666C never trapped in CTZ:  
351  $0.30 \pm 0.03$ ,  $n = 16$ ,  $P = 0.07$ ; Figure S5B). Taken together, these results strongly  
352 suggest that non-desensitizing V666C receptors were not silently modified by M10M.  
353 Instead, the reduced inhibition of active receptors reflected state-dependent protection  
354 from modification.

### 355 **Auxiliary subunits do not alter the geometry of desensitized receptors**

356 Trapping with bis-MTS cross-linkers so far indicated more conformational flexibility of  
357 the LBD layer in desensitized than activated AMPA receptors. However, synaptic  
358 AMPA receptors are rarely expressed alone, and are instead associated with various  
359 auxiliary proteins that re-define their kinetic properties (Schwenk et al., 2012; Jackson  
360 and Nicoll, 2011). We therefore wondered if the presence of auxiliary subunits, such  
361 as Stargazin (Stg), could affect conformational flexibility of AMPA receptors.

362

363 Recently, cryo-EM structures of AMPA receptors in complex with auxiliary subunits  
364 have been acquired in resting, active and desensitized states (Figure 1B) (Chen et al.,  
365 2017; Twomey et al., 2017a). These structures all predict reduced separation of  
366 V666C residues when compared to receptors without auxiliary proteins. For example,  
367 sulfhydryl groups of V666C residues on subunits A and C are 19 Å apart in the  
368 apparent active state of isolated receptors and 15 Å in activated receptors complexed  
369 with Stg (Figure 1C). In the desensitized state, the equivalent residues are 21 Å apart  
370 in homologous kainate receptors (PDB: 5KUF (Meyerson et al., 2016)) and 17 Å in  
371 desensitized GluA2 receptors associated with GSG1L auxiliary proteins (Figure 1C,  
372 PDB: 5VHZ (Twomey et al., 2017b)). If, indeed, auxiliary subunits keep the LBD layer  
373 more compact, we reasoned that their presence should also limit the effects of longer  
374 bis-MTS cross-linkers.



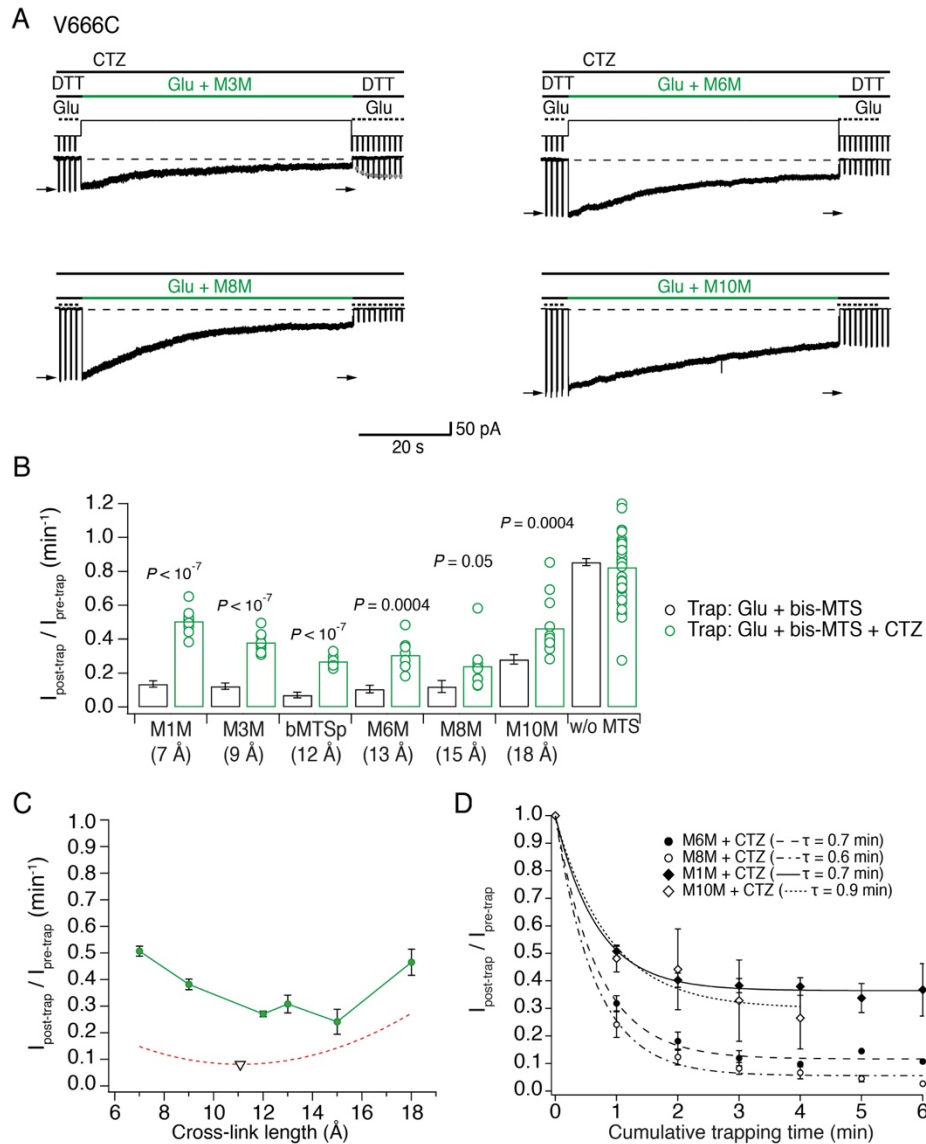

375

376

377

378

379

380

381

382

383

384

385

386

387

388

389

**Figure 5 The active LBD layer is diluted** (A) Current traces of trapping protocols on active V666C receptors. Cyclothiazide (CTZ) was included at 100  $\mu\text{M}$  throughout the experiment to block desensitization. The duration of the trapping pulse is indicated in green. Trapping rate ( $\tau$ ) was determined from the monoexponential fits (red, dotted line;  $n$ : number of patches). For M3M, gray dots indicate recovery from the trap immediately after the trap ( $\tau = 2.0 \pm 0.2$  s,  $n = 8$ ). Extent of trapping was relative to the initial pulses (arrows) (B) Summary of bis-MTS trapping (1 min) of desensitizing (black) and non-desensitizing V666C receptors (green). Desensitizing data are from Figure 2E.  $P$  values compare the desensitizing and non-desensitizing condition. For  $P$  values comparing effects with and without bis-MTS and between the cross-linkers, see Table S2, respectively. Bis-MTS length is indicated in brackets; “w/o MTS”: without MTS. (C) Trapping profile of active V666C receptors after the first minute of exposure (green). Green line connects the points. Fit of the trapping profile of desensitized receptors is shown as a red, dashed line for comparison. Black triangle indicates minimum of the fit at 11 Å. (D) Dependence of the trapping time on the length of the bis-MTS. V666C receptors were exposed up to 6 times to the trapping protocol described in (A). Current reduction was determined after each 1-min application to a bis-MTS. Current decay was described with a monoexponential fit ( $\tau$  in brackets).

390 To test this hypothesis, we repeated the trapping experiments on complexes of AMPA  
391 receptors with Stg (Figure 6). GluA2 and Stg were co-expressed and association of  
392 complexes was assessed by measuring the ratio of kainate current over glutamate  
393 current (KA/Glu). The relative efficacy of the partial agonist kainate is known to be  
394 higher for GluA2-Stg complexes than for GluA2 alone, making it a good marker of  
395 GluA2-Stg association (Tomita et al., 2005; Shi et al., 2009). After establishing  
396 formation of the GluA2 V666C-Stg complexes in the patch, we proceeded with the  
397 trapping protocol that exposed complexes to glutamate and a bis-MTS cross-linker (1  
398  $\mu$ M) for 1 minute (Figure 6A-B), as described previously. No blocker of desensitization  
399 was added and the receptors were allowed to desensitize freely. Therefore, the  
400 crosslinking represents trapping across a mixture of active and desensitized states.

401

402 The trapping results summarized in Figure 6C show that the presence of auxiliary  
403 subunit Stg apparently protected V666C receptors from cross-linking by bis-MTS.  
404 Indeed, following trapping, a robust response was preserved, and could not be  
405 overcome by longer trapping intervals (Figure S6A-B).

406

407 To test whether bis-MTS cross-linkers perhaps act on non-complexed V666C  
408 receptors only, without affecting V666C-Stg complexes, we measured the KA/Glu  
409 current ratio before and after the bis-MTS trap for a series of patches. We reasoned  
410 that if only non-complexed V666C receptors were being modified, the glutamate-  
411 activated current should reduce, but the kainate current (which is almost entirely  
412 carried by GluA2-Stg complexes) should not. Therefore, preferential trapping of non-  
413 complexed V666C mutants should lead to an increase in KA/Glu ratio. As shown in  
414 Figure 6E, the KA/Glu ratio was not affected (before trap:  $0.46 \pm 0.03$ ; after trap:  $0.43$   
415  $\pm 0.02$ ,  $n = 13$ ;  $P = 0.2$ , paired randomisation test), indicating V666C-Stg complexes  
416 were being modified by bis-MTS cross-linkers.

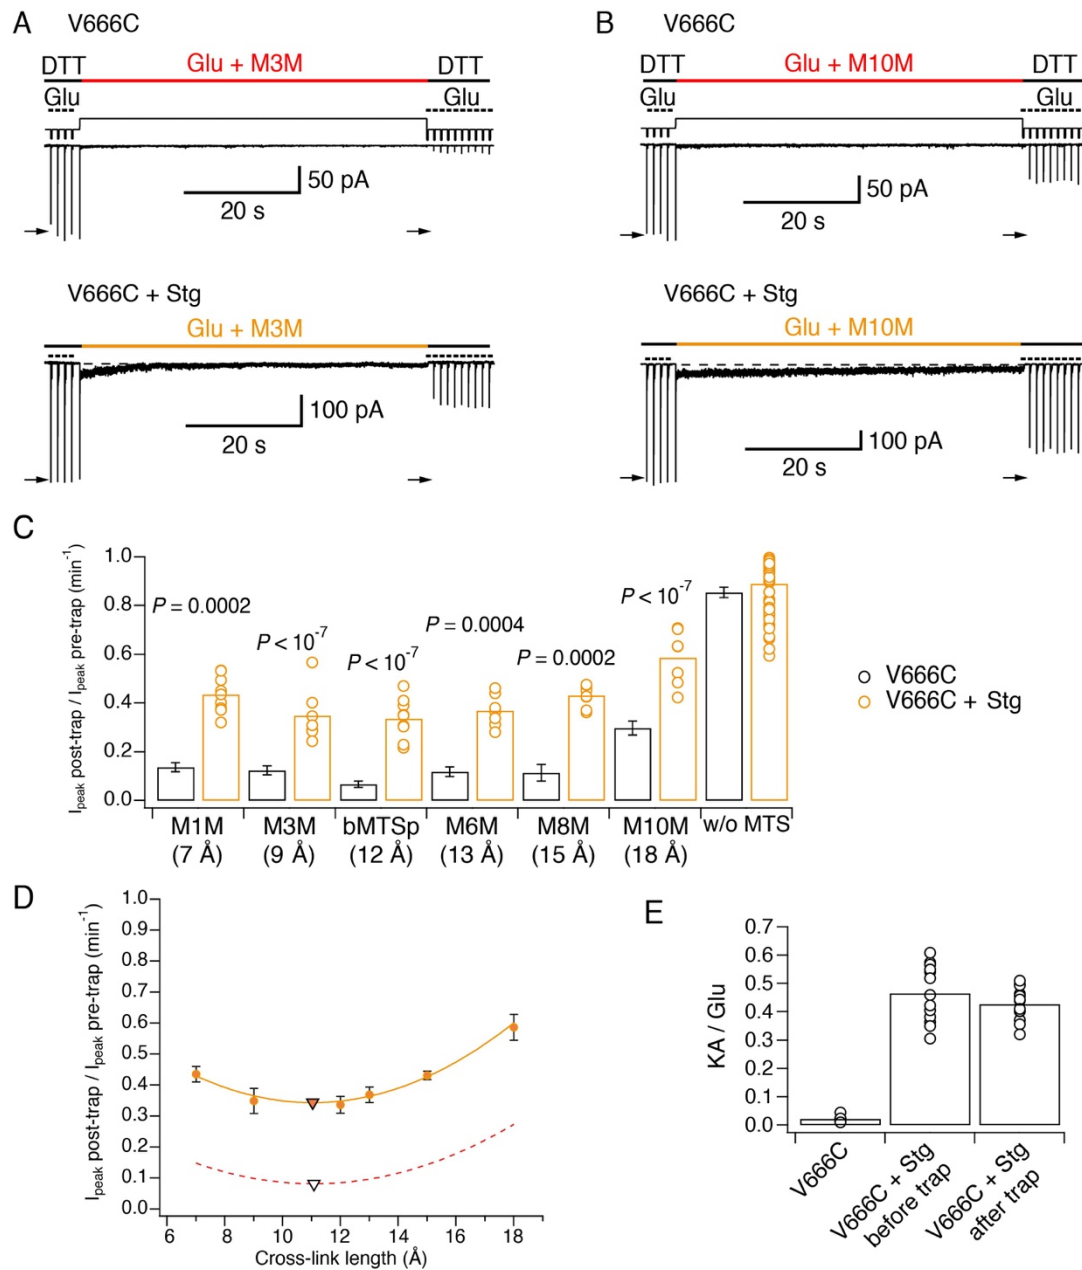

417

418 **Figure 6. Stargazin attenuates effects of bis-MTS cross-linkers.** (A) Current traces of V666C trapping in M3M,

419 without (top) and with Stargazin (Stg; bottom). Legend is the same as in Figure 2, with a trapping pulse shown here

420 in orange. (B) Same as in (A), but for M10M. (C) Trapping effects for V666C without (black) and with Stg (orange).

421 Post- and pre-trap peak current was determined from the control pulses (arrows in (A) and (B)). Data without Stg

422 are the same as in Figure 2D. *P* values compare the effects of the respective cross-linker with and without Stg. For

423 statistics vs. w/o MTS and between cross-linkers, see Table S3. (D) Trapping profile of desensitizing V666C+Stg

424 complexes. The data were fit with a parabola (orange line); the fit reaches minimum (orange triangle) at (11, 0.3).

425 Trapping profile of desensitized receptors without Stg is shown as red, dashed line for comparison (minimum at

426 (11, 0.1); black triangle). (E) The kainate/glutamate (KA/Glu) peak current ratio was determined for each patch

427 before and after trapping with a bis-MTS (similar to the experimental design in Figure 3A-C with 1mM KA and 10

428 mM Glu in 1 mM DTT). V666C+Stg KA/Glu measurements before and after trap shown here are paired recordings,

429 pooled for various bis-MTS cross-linkers.

### 430 **Stargazin maintains active receptors in a compact arrangement**

431 The trapping profile of V666C-Stg complexes (orange in Figure 6D) reflects the partial  
432 protection from trapping in the presence of Stg for all cross-linker lengths, but its  
433 overall shape is practically superposable onto the trapping profile of desensitized  
434 V666C receptors without Stg (red, dashed line in Figure 6D). Strikingly, the two curves  
435 reach their minimum at the same point of 11 Å (triangles in Figure 6D) and have  
436 identical curvature. This indistinguishable length dependence indicated that the  
437 trapping of V666C-Stg complexes came primarily from trapping desensitized  
438 receptors, and that the active complexes of V666C-Stg might be untouched by bis-  
439 MTS cross-linkers.

440  
441 To test this hypothesis, we repeated the trapping protocol in the presence of CTZ, to  
442 block desensitization of V666C-Stg complexes. Two cross-linkers were tested in this  
443 condition: M1M, the shortest one, and M8M, which had the strongest trapping effect  
444 on active V666C receptors without Stg (Figure 5B-C). As predicted, neither bis-MTS  
445 cross-linker had any effect on activated GluA2-Stg complexes (M1M:  $P = 0.1$ ,  $n = 9$ ;  
446 M8M:  $P = 0.2$ ,  $n = 9$ ; paired recordings with and without bis-MTS) (Figure 7). Over  
447 very long exposures, M8M could induce irreversible inhibition, presumably from  
448 residual desensitization (Figure S6). This result confirmed that partial trapping  
449 observed for desensitizing V666C-Stg mainly derived from bis-MTS cross-linkers  
450 accessing desensitized complexes.

451  
452 We next wondered if the protection from trapping observed for active GluA2-Stg  
453 complexes could, at least partly, be explained by reduced accessibility of cysteine  
454 residues during exposure to bis-MTS, perhaps because the Cys666 residues are  
455 buried against other subunits or oriented such that the sulfhydryl groups are  
456 inaccessible for cross-linking. We mined possible conformations of the active LBD  
457 tetramer (PDB: 5WEO) using a coarse docking approach, allowing each active dimer  
458 to move in the membrane plane, and allowing rotation of one dimer with respect to the  
459 other around axes parallel and perpendicular to the active dimer interface (Figure 7D  
460 and E). Interestingly, docked structures with low Cys666 accessibility segregated into  
461 two classes, a loose arrangement where Cys666 were physically close but sterically

462 hindering each other (with the centre of mass separation of the two active dimers  
463 comparable to 5WEO, e.g. models m17 and m32 in Figure 7D), and a tighter  
464 arrangement of the LBDs with V666C close to helix K (with the centre of mass  
465 separation of the two active dimers smaller than in 5WEO, e.g. m223 and m265 in  
466 Figure 7D), not unlike the structure of the V666C mutant LBD bound with  
467 fluorowillardine (5JEI) (Salazar et al., 2017). In that structure, additional shielding of  
468 the V666C side chain is afforded by its being shielded by neighbouring structural  
469 elements.

470

471 Thus, active GluA2-Stg complexes can avoid cross-linking not just by adopting more  
472 compact LBD arrangements, but also by preferring conformations which shield V666C  
473 SG groups.

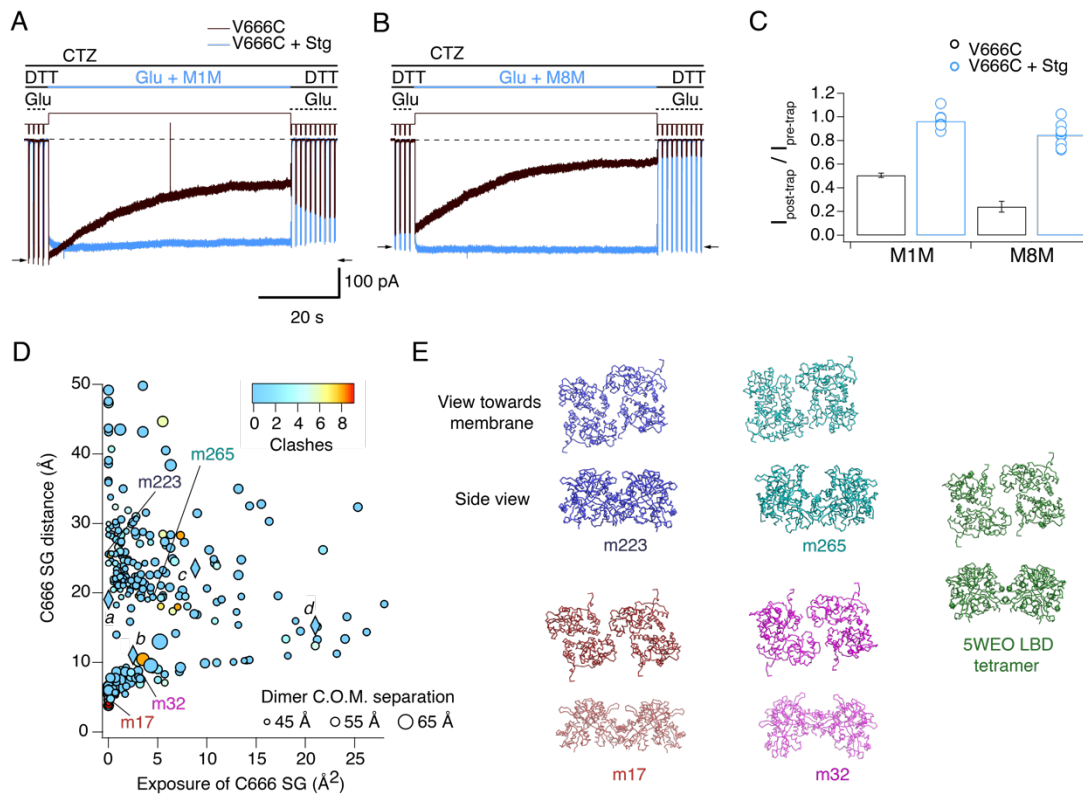

474

475

476

477

478

479

480

481

482

483

484

485

486

487

488

489

490

491

**Figure 7 Stargazin blocks access to bis-MTS cross-linkers in the active state.** (A) Traces showing trapping by M1M in the active state in the absence (black) and presence (blue) of Stargazin (Stg). Legend is the same as in Figure 2, with a trapping pulse shown here in blue. Desensitization was blocked by CTZ (100  $\mu$ M) present throughout the experiment. Glutamate (Glu) was 10 mM and DTT 1mM. (B) Same as in (A), but for M8M cross-linker. (C) Summary of the trapping effects for M1M and M8M in the active state in the absence (black) and presence (blue) of Stg. Pre- and post-trap current was determined from control pulses as indicated by arrows. (D) Putative compact structures that could protect from bis MTS modification. Results of 268 runs of rigid body docking of LBD dimers against each other, to minimize Cys666 access in subunit A and mimic the protection from crosslinking. Results from known structures (5JEI, 4YU0 loose, 4YU0 tight and 5WEO, diamonds *a-d*) and 4 of the generated models – m17, m32, m223, m265 - segregate into two classes, similar to the loose (SG-SG distance between subunits < 10  $\text{\AA}$ ) and tight arrangements (SG-SG distance > 20 $\text{\AA}$ , C666 SG buried close to helix K) (Baranovic et al., 2016). The symbol size corresponds to the dimer centre of mass separation and the colour to the number of atom clashes (distance < 2.2  $\text{\AA}$ ). For reference, dimer centre of mass separations of known structures are: 5JEI, 44  $\text{\AA}$ ; 4YU0 loose, 47  $\text{\AA}$ ; 4YU0 tight, 47 $\text{\AA}$  and 5WEO, 52  $\text{\AA}$ . Note that m17 is selected from a cluster of models with zero clashes (cyan), but adjacent in the graph to two other models with clashes (red circles). (E) LBD arrangements in four models marked on the graph in panel D and the original seed for each optimization, the glutamate bound LBD tetramer from 5WEO full-length GluA2 structure with Stg

## 492 Discussion

493 Technical advances in cryo-electron microscopy have revolutionized the study of  
494 membrane proteins, and the supply of structural information is greater than ever  
495 before. However, as the catalogue of images swells, the need to relate their geometry  
496 to dynamics becomes ever more pressing. In case of AMPA receptors, full-length  
497 structures in complexes with various ligands and auxiliary subunits have been  
498 published. Here we have used a classical crosslinking approach allied to rapid  
499 perfusion to measure distances up to 18 Å in AMPA receptor extracellular domains  
500 across different functional states and in the time domain.

501  
502 Bis-MTS cross-linkers have been used previously to aid identification of movements  
503 underlying state transitions in AMPA and NMDA receptors (Armstrong et al., 2006)  
504 (Tajima et al., 2016). Here, we report effects with a strong dependence on the target  
505 site, length of the cross-linker, functional state of the receptor and the presence or  
506 absence of auxiliary subunits. Since most bis-MTS cross-linkers are alkyl chains and  
507 hence flexible, we tested the bMTSp linker that includes a rigid benzene ring, but  
508 otherwise has a very similar length to M6M. The only difference we observed between  
509 these two cross-linkers was with K493C mutant, with M6M blocking desensitization  
510 more effectively than bMTSp, perhaps indicating an angle between the K493C side  
511 chains that was more easily accommodated by the flexible chain.

512  
513 All bis-MTS cross-linkers inhibited the current, irrespective of the functional state.  
514 Whereas cross-linking of the desensitized states should result in current inhibition,  
515 cross-linking of an open channel would be expected to result in more active receptors.  
516 However, all inter-dimer constraints of the active state so far seem to be inhibitory  
517 (Plested and Mayer, 2009) (Lau et al., 2013; Baranovic et al., 2016; Yelshanskaya et  
518 al., 2016). Whereas the zinc and disulphide bridges, previously used to cross-link  
519 active LBD dimers, only form under strict geometrical requirements, the same cannot  
520 be said for bis-MTS cross-linkers. The cross-linkers are flexible and therefore do not  
521 restrict the trapped LBD tetramer to a single geometry. The inhibitory effect of the  
522 crosslinkers is not universal – at the active intra-dimer interfaces we could potentiate  
523 receptors as shown previously (Armstrong et al., 2006). It appears that crosslinks

524 between dimer pairs, or indeed any restriction between the active dimers, leads to a  
525 decrease in activity. The mechanism behind this inhibition remains frustratingly  
526 unclear.

527

528 In Figure 8A-B, the trapping profiles of V666C receptors with the available structural  
529 models of GluA2 in the equivalent condition are compared. The shallow trapping  
530 profile of desensitized AMPA receptors indicates a structural ensemble of  
531 conformations broadly in agreement with multiple desensitized states (Meyerson et  
532 al., 2014) (Robert and Howe, 2003). Even though the LBD dimer-dimer separation  
533 observed in the model ( $>18$  Å, EMDB: 2688) was not tested with the bis-MTS cross-  
534 linker of the corresponding length, extrapolation of the trapping profile indicates such  
535 conformations are available to desensitized AMPA receptors. However, the longest  
536 cross-linker (18 Å) was the slowest one to act on desensitized receptors, indicating  
537 that this conformation, and more 'dilated' ones, are not readily available for cross-  
538 linking, but slowly get populated during prolonged exposures to agonist. The longest  
539 cross-linker, M10M, was also the slowest one to act in the active state. There, the  
540 most readily accessible separation of V666C residues, in terms of strength and speed  
541 of trapping, was at 15 Å (green in Figure 8B), with 19 Å separation, predicted by the  
542 structural model (PDB: 4UQ6), taking longer to populate. Notably, 'dilations' of  
543 extracellular domains were also seen in antagonist-bound NMDA receptors (Zhu et  
544 al., 2016).

545

546 The presence of Stg lead to universal attenuation of the cross-linking effect, for all bis-  
547 MTS lengths and both functional states, desensitized and active (orange and blue in  
548 Figure 8A and B, respectively). The longest crosslinker (M10M) produced the least  
549 trapping, having reduced trapping potency even following long exposures (~3 min).  
550 Thus, the LBD layer could not enter a widely-splayed, dilated form for majority of these  
551 receptors. This result seems to chime with structural and FRET experiments (Shaikh  
552 et al., 2016), where the presence of Stg made the LBD and ATD layer more compact.  
553 In the desensitized state, the shape of the trapping profile is the same, with or without  
554 Stg (Figure 8A), with both parabola reaching a minimum point at 11 Å (triangles in  
555 Figure 8A). This is in excellent agreement with the structure of desensitized GluA2-



556 Stg complex (PDB: 5VOV). In the active state, our results deviate from the available  
557 full-length active structures. Both short and long (7 or 15 Å) bis-MTS reagents failed  
558 to inhibit currents in the first minute of trapping, indicating more compact LBD  
559 arrangements over this timescale than obtained in the structures.

560

561 The protection from trapping in our cross-linking experiments most likely has multiple  
562 origins. Although “protection” could result from a persistent long-distance separation,  
563 outside the range of the crosslinkers, several observations and common sense speak  
564 against this possibility. First, we previously showed that active receptors (glutamate +  
565 CTZ) could be trapped by zinc bridges in compact arrangements (Baranovic et al.,  
566 2016). Second, the long distance must be maintained throughout the exposure,  
567 because any transit between compact and dilated arrangements must pass through  
568 intermediate separations, allowing crosslinkers to span the gap. Third, even the most  
569 dilated structures are in the range of crosslinker lengths that we used. Fourth, the  
570 mixed trapping condition for GluA2-Stg complexes in the absence of CTZ apparently  
571 supports desensitized state trapping over a wide range of geometries but no additional  
572 active state trapping. We cannot discount specific, state-dependent protection from  
573 crosslinking, produced by a unique, closed-cleft LBD conformation provoked by Stg in  
574 the active state, but it seems to us unlikely. We reasoned that protection from  
575 crosslinking could, at least partly, be accounted for by reduced accessibility of cysteine  
576 residues during exposure to bis-MTS. Docking data in Figure 7D-E show that  
577 conformations which reduce the accessibility of the V666C side chains are indeed  
578 accessible to the active LBDs in the presence of Stg, with some of them acquiring  
579 more compact arrangements than in the current structural models of the full-length  
580 receptor in the active state (Chen et al., 2017; Twomey et al., 2017a).

581

582 No matter how avid and complete trapping is, a possible source of receptor activity  
583 after trapping is the activity of free (non-crosslinked) subunits (Figure S7). In all our  
584 experiments, subunits *A* and *C* are trapped whereas *B* and *D* are not. In GluA2  
585 receptors without Stg, even with desensitization blocked, the activity of only two  
586 subunits (e.g. *B* and *D*) produces low conductance openings with short open times  
587 (Rosenmund et al., 1998). But the presence of Stg (Coombs et al., 2017) (Zhang et

588 al., 2014) increases the current carried by receptors with one or two active subunits.  
589 In our experiments, Stg had an indefatigable effect of maintaining receptor activity in  
590 the limit of long exposures to bis-MTS. The effect of Stg was inordinately large, with a  
591 maximum effect of the crosslinking leaving approximately half the receptor activity  
592 unscathed. Can the two non-crosslinked subunits (*B* and *D*) produce this level of  
593 activity? A simple back-of-the-envelope calculation suggests this effect is larger than  
594 expected. Single channel recordings of GluA2 with Stg reveal that the conductance  
595 from two subunits, with desensitization blocked, should be on average about 40% but  
596 with  $P_{\text{open}} < 1$  (Coombs et al., 2017). Therefore, residual activity of the non-crosslinked  
597 subunits is higher than expected, unless the B and D subunits have a predominant  
598 role in driving channel gating (as proposed from structural studies (Sobolevsky et al.,  
599 2009).

600

601 We presume that the basal compactness of the LBD layer is related to observation  
602 that longer cross-linkers have slower trapping rates, indicating slow adoption of  
603 'dilated' conformations. Higher bis-MTS concentrations sped up the reactions  
604 accordingly, while leaving the relative order of trapping rates intact. Alkylthiosulfonates  
605 are generally distinguished by their extremely rapid reactivity in mild conditions,  
606 selectivity for cysteinyl sulfhydryl groups, general reversibility upon addition of thiols  
607 such as DTT and their ability to effect quantitative and complete conversion to the  
608 disulphide without applying a large excess of reagent (Kenyon and Bruice, 1977). Our  
609 reaction rates are close to the maximum expected ( $10^5 \text{ M}^{-1}\text{s}^{-1}$ ; (Liu et al., 1997)).

610

611 Physiological activation and desensitization of AMPA receptors takes place on a  
612 millisecond timescale, and we monitored this process wherever possible during our  
613 experiments. Generally, the remaining current responses were not altered following  
614 bis-MTS exposures. The fast gating contrasts to desensitized states trapped by bis-  
615 MTS cross-linkers that take tens of minutes to recover. Though we necessarily worked  
616 at low bis-MTS concentrations to avoid confounding effects like chaining and non-  
617 specific modification, mandating slow trapping, the slow recovery from trapping is  
618 striking. It seems reasonable to assume that the degree of stabilization by different  
619 crosslinkers is similar, and that the difference in stability comes from the states

620 themselves. This idea is supported by the cut-off that we observe – for crosslinkers  
621 longer than 10 Å, crosslinking in desensitized states is irreversible over 10 minutes  
622 (also in 5-fold higher concentration of the reducing agent). It is possible that upon  
623 cross-linking, V666C residues adopt conformations that make them inaccessible to  
624 the reducing agent, but this would then have to be highly specific for bis-MTS reagents  
625 longer than 9 Å and state-specific (due to much faster recovery rates of active than  
626 desensitized receptors after trapping in M1M or M3M). In addition, in reducing  
627 conditions, AMPA receptors recover from disulphide crosslinking at the same sites in  
628 hundreds of milliseconds (Lau et al., 2013; Salazar et al., 2017). Assuming that the  
629 length of the bis-MTS cross-linkers reflects level of structural rearrangements and  
630 following the trend plotted in Figure 4H, this suggests that AMPA receptors exposed  
631 to brief glutamate transients at synapses are unlikely to undergo extreme  
632 conformational changes, due to their complexation with auxiliary subunits.  
633 Considering that all of the experiments presented here were done with over-expressed  
634 receptors and auxiliary subunit Stg, it is possible that V666C-Stg complexes had  
635 variable stoichiometry of association, depending on the expression level. This could  
636 impact how Stg affects conformational dynamics of the receptors, but a detailed  
637 investigation of this is beyond the scope of this work. We note, however, that the  
638 presence of two copies of auxiliary subunit GSG1L were sufficient to keep the LBD  
639 layer compact in structural experiments (Twomey et al., 2017b).

640

641 Long agonist exposures of minutes to hours are standard in structural biology  
642 experiments and could, thus, contribute to the prevalence of more ‘relaxed’  
643 conformations in full-length structures without auxiliary subunits (Figure 8C). However,  
644 long exposures to agonists are at odds with synaptic conditions where AMPA  
645 receptors see glutamate on a millisecond timescale, before it is actively cleared by  
646 transporters (Clements, 1996). Furthermore, any large structural rearrangements of  
647 the extracellular domains would need to be accommodated by the crowded synaptic  
648 environment (High et al., 2015; Tao et al., 2018) and potential presynaptic interaction  
649 partners (Saglietti et al., 2007) (Elegheert et al., 2016). When in complex with auxiliary  
650 subunits, no functional state of AMPA receptors necessitates large domain  
651 movements, and compact arrangements of the extracellular layer can sustain the

652 gating process. We conclude that extracellular domains of synaptic AMPA receptors  
 653 are unlikely to undergo large structural rearrangements during synaptic transmission  
 654 and instead work in a fairly compact conformational regime, unless faced with long  
 655 exposures to glutamate in pathological conditions.

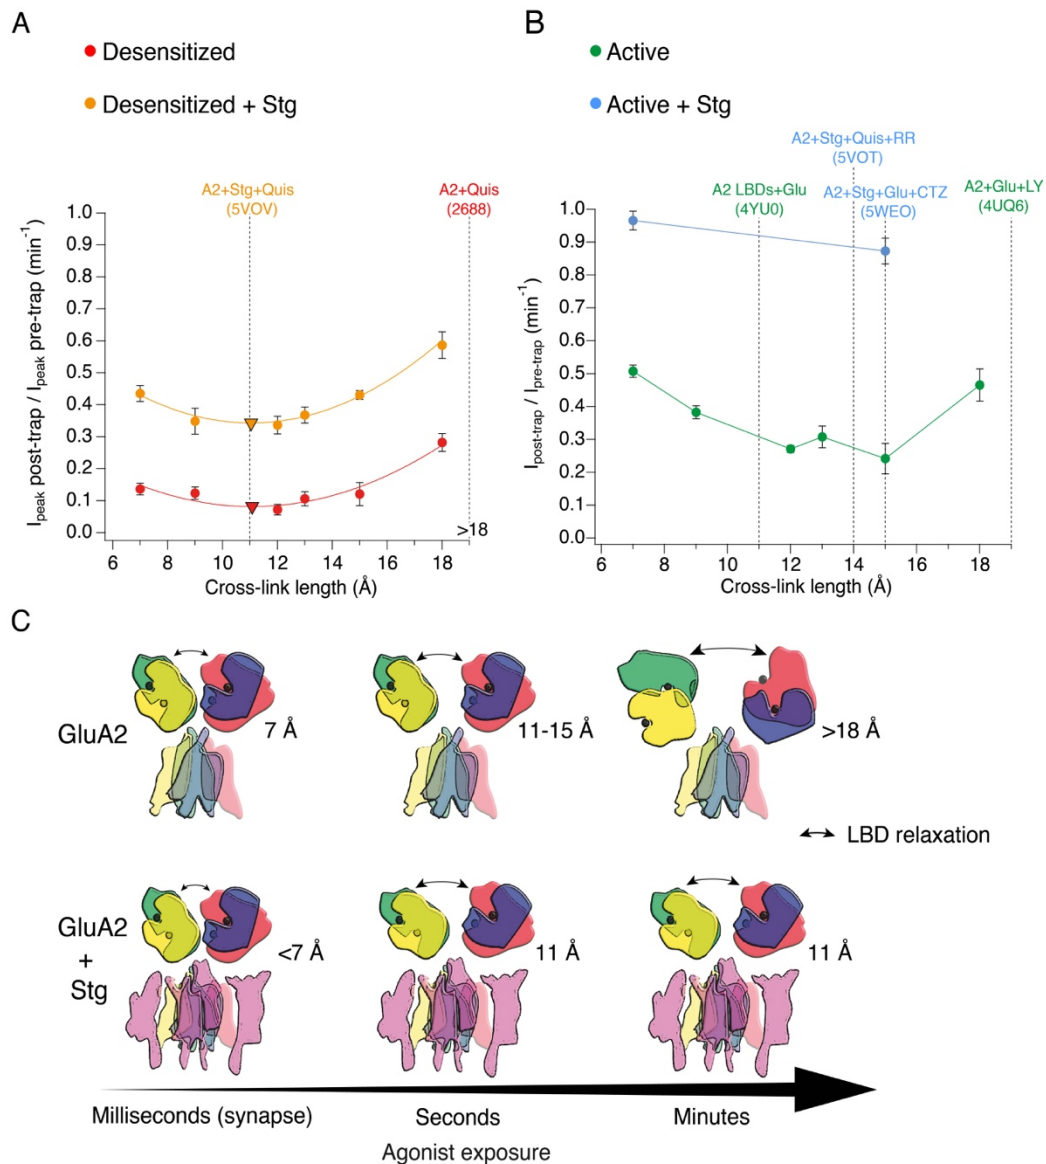

656

657 **Figure 8 The presence of Stargazin and short agonist exposures keep the agonist-bound LBD layer**  
 658 **compact.** (A) Trapping profiles for V666C in desensitized states, without (red) and with (orange) Stargazin (Stg).  
 659 Solid lines are fit parabola, with local minima indicated as triangles. For desensitized condition without Stg,  
 660 minimum is reached at (11, 0.1) and with Stg at (11, 0.3). The right handside of the x-axis is marked as >18 Å,  
 661 as the resolution of the only available desensitized structure without auxiliary subunits is too low to measure residue  
 662 distances. Vertical, dashed, black lines indicate V666C sulfhydryl separation in the respective structure (PDB  
 663 accession codes in brackets). Names of structures are colour-coded same as the trapping profiles. (B) Same as in  
 664 (A), but for active state without (green) and with (orange) Stg. 4YU0 is a structure of soluble, isolated LBDs. Quis  
 665 stands for quisqualate (full agonist), RR for (R, R)-2b (Kaae et al., 2007) and LY for LY451646 (both desensitization

666 blockers). (C) Schematic summarizing the bis-MTS cross-linking results. Colour-code same as in Figure 1; ATDs  
667 are omitted. Black spheres represent bound glutamate. Upper row: in the absence of Stg, GluA2 receptors access  
668 'dilated' LBD conformation (black arrows) upon long exposures to agonist. Bottom row: presence of Stg limits  
669 'dilation' of the LBD layer even at longer agonist exposures.

670

## 671 **Acknowledgements**

672 We thank Clarissa Eibl and Mark Mayer for comments on the manuscript. This work  
673 was funded by the ERC Grant "Gluactive" (647895) and the NeuroCure Cluster of  
674 Excellence (DFG EXC-257). A.J.R.P. is a Heisenberg Professor of the DFG (Project  
675 number 323514590).

676

## 677 **Author Contributions**

678 J.B. and A.J.R.P. designed experiments, J.B. performed experiments, A.J.R.P. wrote  
679 PYTHON code and did the docking computations. J.B. and A.J.R.P. analysed data  
680 and wrote the manuscript.

681

## 682 **Experimental Procedures**

### 683 *Molecular Biology*

684 In all experiments, the unedited (Q586) GluA2flip version of rat GluA2 gene was  
685 expressed from the pRK5 vector. Amino acid numbering refers to the mature receptor  
686 assuming a signal peptide of 21 amino acids in length. As a marker of transfection,  
687 eGFP was expressed from the same vector, downstream from an internal ribosomal  
688 entry sequence (IRES). Mouse Stargazin gene (a kind gift from Susumu Tomita) was  
689 expressed from a separate pRK8 vector containing IRES-dsRed (Carbone and  
690 Plested, 2016). All mutations were introduced by overlap PCR and confirmed by  
691 double-stranded sequencing.

692

### 693 *Cell Culture and Transfection*

694 GluA2 constructs were expressed transiently in HEK293 cells using calcium-  
695 phosphate precipitation or PEI method as described previously (Baranovic et al., 2016;  
696 Riva et al., 2017). HEK293 cells were obtained from the Leibniz Forschungsinstitut  
697 DSMZ (Deutsche Sammlung von Mikroorganismen und Zellkulturen GmbH, Germany)

698 ACC no. 305 (RRID: CVCL\_0045) and tested negative for mycoplasma. Cells were  
699 maintained in MEM Eagle medium (PAN-Biotech GmbH, Aidenbach, Germany)  
700 supplemented with 10% (v/v) fetal bovine serum and antibiotics (penicillin (100 U/mL)  
701 and streptomycin (0.1 mg/mL; PAN-Biotech).

702

703 For transfections, 2-3  $\mu$ g of DNA was transfected per 35 mm dish and cells were  
704 washed after 6-8 hours. Recordings were performed 24-72 hours after the transfection  
705 at room temperature. For transfections with Stargazin, Stargazin DNA was co-  
706 transfected with GluA2 DNA at 2:1 mass ratio and after the transfection, cell medium  
707 was supplemented with 40  $\mu$ M NBQX to reduce Stargazin-induced cytotoxicity.

708

### 709 *Solutions*

710 Chemicals were obtained from Sigma Aldrich (Munich, Germany), Abcam plc  
711 (Cambridge, UK) and Hello Bio (Bristol, UK). MTS compounds were obtained from  
712 Toronto Research Chemicals (North York, Canada).

713

714 The internal (pipette) solution for recordings without Stargazin contained (mM): 115  
715 NaCl, 1 MgCl<sub>2</sub>, 0.5 CaCl<sub>2</sub>, 10 NaF, 5 Na<sub>4</sub>BAPTA, 10 Na<sub>2</sub>ATP, 5 HEPES, titrated to pH  
716 7.3 with NaOH. For recordings with Stargazin, the internal solution was slightly  
717 modified: 120 NaCl, 0.5 CaCl<sub>2</sub>, 10 NaF, 5 Na<sub>4</sub>BAPTA, 5 HEPES and 0.05 spermine,  
718 pH 7.3. The external recording solution in all experiments contained (mM): 150 NaCl,  
719 0.1 MgCl<sub>2</sub>, 0.1 CaCl<sub>2</sub> and 5 HEPES, pH 7.3. Different drugs were added to the external  
720 solution as needed. Glutamate was always applied at 10 mM and DL-dithiothreitol  
721 (DTT) at 1 mM. Cyclothiazide (CTZ) and kainate (KA) were thawed from stock  
722 solutions on the day of the experiment. Final CTZ and KA concentrations in all  
723 experiments were 100  $\mu$ M and 1 mM, respectively.

724

725 All MTS compounds were obtained as powder. Whereas monofunctional MTS  
726 reagents are known to be highly reactive and unstable in aqueous solutions (Kenyon  
727 and Bruice, 1977), this information is lacking for bifunctional cross-linkers used in this  
728 study. Hence, we took special care to minimize exposure of bis-MTS compounds to  
729 oxidizing (aqueous) solutions (Takatsuka and Nikaido, 2010). The powder was

730 dissolved in DMSO, aliquoted and kept on ice on the day of the experiment. Once a  
731 stable patch recording was obtained, an aliquot was dissolved in external solution to  
732 a final concentration of 1  $\mu$ M and applied to the patch. This way, aqueous bis-MTS  
733 solutions were on average 2-3 minutes old at the moment of application. Each MTS  
734 stock was tested with GluA2 wild-type receptors and K493C receptors as negative and  
735 positive controls, respectively. The final MTS concentration of 1  $\mu$ M was chosen based  
736 on previous work (Sobolevsky et al., 2003; Yelshansky et al., 2004). We avoided  
737 higher concentrations of MTS compounds due to potential cross-reactivity and  
738 chaining effects.

739

#### 740 *Patch clamp electrophysiology*

741 Ligands and drugs were applied to outside-out patches via a custom made 4-barrel  
742 glass (VitroCom, USA) mounted to a linear piezo-electric wafer (PiezoMove P-601.4,  
743 PI, Germany) (Lau et al., 2013). Two barrels were perfused with control solutions and  
744 the third barrel with the trapping solution, as described below. All patches were voltage  
745 clamped at -40 mV unless stated otherwise. Currents were low-pass filtered at 10 kHz  
746 (-3 dB cut-off, eight-pole Bessel filter) using an Axopatch200B amplifier (Molecular  
747 Devices, U.S.A.) and acquired with AxographX software (Axograph Scientific,  
748 Australia, RRID:SCR\_014284) at 20 kHz sampling rate via Instrutech ITC-18 digitizer  
749 (HEKA, Germany). Current traces were digitally filtered at 1 kHz (low-pass) for  
750 presentation in figures.

751

752 To assess the effect of different bifunctional cross-linkers on AMPA receptors, the  
753 receptors were exposed to the cross-linker (1  $\mu$ M) for 1 minute. Before and after this  
754 trapping exposure, the current in the patch was tested with control pulses that  
755 contained only 10 mM glutamate, without the cross-linker and in the presence of DTT  
756 (1 mM) as a reducing agent (Figure 2A-C). Four control pulses before application of  
757 the cross-linker provided a measure of the patch current before any exposure to the  
758 cross-linker. Accordingly, (up to thirty) control pulses recorded after the MTS  
759 application, were used to assess any changes in the patch current imparted by the  
760 cross-linker treatment.

761

762 For recordings of GluA2 receptors co-expressed with auxiliary subunit Stargazin, care  
763 must be taken that GluA2 receptors are indeed associating with Stargazin. One  
764 strategy to minimize the presence of lone V666C receptors relies on the relief of  
765 spermine (polyamine) block at positive voltages imparted by complexation with  
766 Stargazin (Carbone and Plested, 2016). Although we have included spermine in the  
767 pipette solution and measured relieve of block for each patch, we did not perform  
768 recordings at positive voltages, as the currents were not stable enough during  
769 minutes-long trapping protocols. Instead, a change in kainate efficacy was used as a  
770 marker of GluA2-Stargazin association as described in the text.

771

### 772 *Analysis*

773 Trapping effects were quantified as the ratio of the average current after the trap  
774 (determined from the 2<sup>nd</sup> post-trap control pulse) and average current before the trap  
775 (determined from the 4 pre-trap control pulses; arrows in Figure 2A-C):

$$Active\ fraction = \frac{I_{post\ trap}}{I_{pre\ trap}}$$

776

777

778 In case of desensitizing receptors, peak current was measured and in the case of non-  
779 desensitizing receptors, steady-state current.

780

781 The trapping time of each cross-linker was determined from cumulative exposures to  
782 a bis-MTS of up to 6 minutes (6 repetitions of the trapping protocol). After each  
783 application, current reduction was determined with respect to the initial current in the  
784 patch, before any trap. The resulting current decay was described by a  
785 monoexponential fit in Igor Pro (v7.06, Wavemetrics, Lake Oswego, Oregon, U.S.A.,  
786 RRID:SCR\_000325).

787

788 To determine the rate of recovery from trapping by MTS cross-linkers, the number of  
789 post-trap control pulses was increased until full recovery was attained. An envelope of  
790 post-trap peak current responses was then created in Igor Pro and fit with a  
791 monoexponential. This approach was possible only for faster recovery rates, on the



792 time scale of seconds, such as recovery of desensitized V666C receptors from  
793 trapping with M1M (Figure 2B and 4D) and recovery of active V666C receptors from  
794 trapping with M1M and M3M (Figure 5A). With longer bis-MTS cross-linkers, the  
795 recovery time increased from seconds to minutes, making direct measurements of the  
796 recovery time from post-trap control pulses impractical. Instead, the experimental  
797 design was re-adjusted to allow measurements of long recovery times as described in  
798 Figure 4A-C. In brief, peak current in the patch was initially recorded with 100 ms  
799 jumps into glutamate in control conditions until it stabilized. Then, a trapping protocol  
800 was performed as described above, with control pulses before and after the trap. After  
801 the trapping protocol, the current in the patch was again monitored, for about 10  
802 minutes, with fast control jumps into glutamate in order to follow any potential recovery  
803 of the peak current. In this time period, desensitized V666C receptors managed to  
804 recover only from trapping by M1M and M3M (Figure 4D-G), in which case the  
805 recovery was fit with a monoexponential.

806

807 Trapping profiles (Figure 2G and 6D) were fit with a parabola in Igor Pro:

$$808 \quad f(x) = K_0 + K_1(x - K_2)^2$$

809

810 where  $K_1$  defines the curvature,  $K_0$  the minimum effect and  $K_2$  the x value at the  
811 minimum. Data points were weighted by the standard error of the mean for the fit.

812

### 813 *Computational docking*

814 To investigate structures of the LBD tetramer that could preclude trapping by blocking  
815 access to the Cys666 SG moiety, we treated each dimer as a rigid body and subjected  
816 them to rotations and translations in the membrane plane. Python scripts (available at  
817 [github.com/apested/cystance](https://github.com/apested/cystance)) were written as a glue for molecular manipulations in  
818 PyMOL molecular manipulations and CCP4 (RRID:SCR\_007255) functions to  
819 measure geometry and exposure of the Cysteine (AREAIMOL, NCONT (Winn et al.,  
820 2011)). For each run, trial arrangements that reduced Cys666 SG accessibility in  
821 subunit A whilst also keeping the dimers in close proximity (with minimal atom clashes)  
822 and maintaining physiologically plausible in-plane linker arrangements were retained  
823 as seeds for subsequent rounds, and the step size was reduced. Trial arrangements

824 with more than 10 atom clashes ( $< 2.2 \text{ \AA}$ ) were rejected. No refinement was done to  
825 eliminate spurious clashes from flexible surface residues. The optimization was ended  
826 when no further improvement was possible. Each search lasted about 5-10 minutes  
827 on a 2017 Macbook Pro.

828  
829 All  $P$  values were determined by non-parametric randomisation test (non-paired,  
830 unless stated otherwise), using at least  $10^5$  iterations (DC-Stats suite:  
831 <https://github.com/apested/DC-Stats>). Bars in graphs indicate mean and error bars  
832 SEM.

833  
834 Structural models and related measurements were visualized and measured in  
835 PyMOL (v2.0, RRID:SCR\_000305) (The PyMOL Molecular Graphics System, Version  
836 2.0 Schrödinger, LLC). The length of bis-MTS cross-linkers was measured in  
837 ChemDraw Professional (PerkinElmer, U.S.A.).

## 838 References

- 839 1. Armstrong, N., Jasti, J., Beich-Frandsen, M., and Gouaux, E. (2006). Measurement  
840 of conformational changes accompanying desensitization in an ionotropic glutamate  
841 receptor. *Cell* *127*, 85-97.
- 842 2. Baranovic, J., Chebli, M., Salazar, H., Carbone, A. L., Faelber, K., Lau, A. Y.,  
843 Daumke, O., and Plested, A. J. (2016). Dynamics of the Ligand Binding Domain Layer  
844 during AMPA Receptor Activation. *Biophys J* *110*, 896-911.
- 845 3. Cais, O., Herguedas, B., Krol, K., Cull-Candy, S. G., Farrant, M., and Greger, I. H.  
846 (2014). Mapping the Interaction Sites between AMPA Receptors and TARPs Reveals  
847 a Role for the Receptor N-Terminal Domain in Channel Gating. *Cell Rep* *9*, 728-740.
- 848 4. Carbone, A. L., and Plested, A. J. R. (2016). Superactivation of AMPA receptors by  
849 auxiliary proteins. *Nat Commun* *7*, 10178.
- 850 5. Chen, L., Dürr, K. L., and Gouaux, E. (2014). X-ray structures of AMPA receptor-  
851 cone snail toxin complexes illuminate activation mechanism. *Science* *345*, 1021-1026.
- 852 6. Chen, S., Zhao, Y., Wang, Y., Shekhar, M., Tajkhorshid, E., and Gouaux, E. (2017).  
853 Activation and Desensitization Mechanism of AMPA Receptor-TARP Complex by  
854 Cryo-EM. *Cell* *170*, 1234-1246.e14.
- 855 7. Clements, J. D. (1996). Transmitter timecourse in the synaptic cleft: its role in  
856 central synaptic function. *Trends Neurosci* *19*, 163-171.
- 857 8. Colquhoun, D., Jonas, P., and Sakmann, B. (1992). Action of brief pulses of  
858 glutamate on AMPA/kainate receptors in patches from different neurones of rat  
859 hippocampal slices. *J Physiol* *458*, 261-287.
- 860 9. Constals, A., Penn, A. C., Compans, B., Toulmé, E., Phillipat, A., Marais, S.,  
861 Retailleau, N., Hafner, A.-S., Coussen, F., Hosy, E., and Choquet, D. (2015).  
862 Glutamate-Induced AMPA Receptor Desensitization Increases Their Mobility and  
863 Modulates Short-Term Plasticity through Unbinding from Stargazin. *Neuron*
- 864 10. Coombs, I. D., MacLean, D. M., Jayaraman, V., Farrant, M., and Cull-Candy,  
865 S. G. (2017). Dual Effects of TARP  $\gamma$ -2 on Glutamate Efficacy Can Account for AMPA  
866 Receptor Autoinactivation. *Cell Rep* *20*, 1123-1135.
- 867 11. Dürr, K. L., Chen, L., Stein, R. A., De Zorzi, R., Folea, I. M., Walz, T.,  
868 Mchaourab, H. S., and Gouaux, E. (2014). Structure and Dynamics of AMPA Receptor  
869 GluA2 in Resting, Pre-Open, and Desensitized States. *Cell* *158*, 778-792.
- 870 12. Elegheert, J., Kakegawa, W., Clay, J. E., Shanks, N. F., Behiels, E., Matsuda,  
871 K., Kohda, K., Miura, E., Rossmann, M., Mitakidis, N., Motohashi, J., Chang, V. T.,  
872 Siebold, C., Greger, I. H., Nakagawa, T., Yuzaki, M., and Aricescu, A. R. (2016).  
873 Structural basis for integration of GluD receptors within synaptic organizer complexes.  
874 *Science* *353*, 295-299.
- 875 13. Geiger, J. R., Melcher, T., Koh, D. S., Sakmann, B., Seeburg, P. H., Jonas, P.,  
876 and Monyer, H. (1995). Relative abundance of subunit mRNAs determines gating and  
877  $Ca^{2+}$  permeability of AMPA receptors in principal neurons and interneurons in rat  
878 CNS. *Neuron* *15*, 193-204.
- 879 14. Guan, L., Murphy, F. D., and Kaback, H. R. (2002). Surface-exposed positions  
880 in the transmembrane helices of the lactose permease of *Escherichia coli* determined  
881 by intermolecular thiol cross-linking. *Proc Natl Acad Sci U S A* *99*, 3475-3480.
- 882 15. Herguedas, B., García-Nafria, J., Cais, O., Fernández-Leiro, R., Krieger, J., Ho,  
883 H., and Greger, I. H. (2016). Structure and organization of heteromeric AMPA-type  
884 glutamate receptors. *Science*

- 885 16. High, B., Cole, A. A., Chen, X., and Reese, T. S. (2015). Electron microscopic  
886 tomography reveals discrete transclef elements at excitatory and inhibitory synapses.  
887 *Front Synaptic Neurosci* 7, 9.
- 888 17. Jackson, A. C., and Nicoll, R. A. (2011). The Expanding Social Network of  
889 Ionotropic Glutamate Receptors: TARPs and Other Transmembrane Auxiliary  
890 Subunits. *Neuron* 70, 178-199.
- 891 18. Kaae, B. H., Harpsøe, K., Kastrup, J. S., Sanz, A. C., Pickering, D. S., Metzler,  
892 B., Clausen, R. P., Gajhede, M., Sauerberg, P., Liljefors, T., and Madsen, U. (2007).  
893 Structural proof of a dimeric positive modulator bridging two identical AMPA receptor-  
894 binding sites. *Chem Biol* 14, 1294-1303.
- 895 19. Kenyon, G. L., and Bruice, T. W. (1977). Novel sulfhydryl reagents. *Methods*  
896 *Enzymol* 47, 407-430.
- 897 20. Lau, A. Y., Salazar, H., Blachowicz, L., Ghisi, V., Plested, A. J. R., and Roux,  
898 B. (2013). A conformational intermediate in glutamate receptor activation. *Neuron* 79,  
899 492-503.
- 900 21. Liu, Y., Holmgren, M., Jurman, M. E., and Yellen, G. (1997). Gated access to  
901 the pore of a voltage-dependent K<sup>+</sup> channel. *Neuron* 19, 175-184.
- 902 22. Loo, T. W., and Clarke, D. M. (2001). Determining the dimensions of the drug-  
903 binding domain of human P-glycoprotein using thiol cross-linking compounds as  
904 molecular rulers. *J Biol Chem* 276, 36877-36880.
- 905 23. Meyerson, J. R., Kumar, J., Chittori, S., Rao, P., Pierson, J., Bartesaghi, A.,  
906 Mayer, M. L., and Subramaniam, S. (2014). Structural mechanism of glutamate  
907 receptor activation and desensitization. *Nature* 514, 328-334.
- 908 24. Meyerson, J. R., Chittori, S., Merk, A., Rao, P., Han, T. H., Serpe, M., Mayer,  
909 M. L., and Subramaniam, S. (2016). Structural basis of kainate subtype glutamate  
910 receptor desensitization. *Nature* 537, 567-571.
- 911 25. Nakagawa, T., Cheng, Y., Ramm, E., Sheng, M., and Walz, T. (2005). Structure  
912 and different conformational states of native AMPA receptor complexes. *Nature* 433,  
913 545-549.
- 914 26. Pasternack, A., Coleman, S. K., Jouppila, A., Mottershead, D. G., Lindfors, M.,  
915 Pasternack, M., and Keinänen, K. (2002). Alpha-amino-3-hydroxy-5-methyl-4-  
916 isoxazolepropionic acid (AMPA) receptor channels lacking the N-terminal domain. *J*  
917 *Biol Chem* 277, 49662-49667.
- 918 27. Plested, A. J. R., and Mayer, M. L. (2009). AMPA receptor ligand binding  
919 domain mobility revealed by functional cross linking. *J Neurosci* 29, 11912-11923.
- 920 28. Riva, I., Eibl, C., Volkmer, R., Carbone, A. L., and Plested, A. J. (2017). Control  
921 of AMPA receptor activity by the extracellular loops of auxiliary proteins. *Elife* 6,
- 922 29. Robert, A., and Howe, J. R. (2003). How AMPA receptor desensitization  
923 depends on receptor occupancy. *J Neurosci* 23, 847-858.
- 924 30. Rosenmund, C., Stern-Bach, Y., and Stevens, C. F. (1998). The tetrameric  
925 structure of a glutamate receptor channel. *Science* 280, 1596-1599.
- 926 31. Saglietti, L., Dequidt, C., Kamieniarz, K., Rousset, M.-C., Valnegri, P.,  
927 Thoumine, O., Beretta, F., Fagni, L., Choquet, D., Sala, C., Sheng, M., and Passafaro,  
928 M. (2007). Extracellular interactions between GluR2 and N-cadherin in spine  
929 regulation. *Neuron* 54, 461-477.
- 930 32. Salazar, H., Eibl, C., Chebli, M., and Plested, A. (2017). Mechanism of partial  
931 agonism in AMPA-type glutamate receptors. *Nat Commun* 8, 14327.

- 932 33. Schwenk, J., Harmel, N., Brechet, A., Zolles, G., Berkefeld, H., Müller, C. S.,  
933 Bildl, W., Baehrens, D., Hüber, B., Kulik, A., Klöcker, N., Schulte, U., and Fakler, B.  
934 (2012). High-resolution proteomics unravel architecture and molecular diversity of  
935 native AMPA receptor complexes. *Neuron* *74*, 621-633.
- 936 34. Shaikh, S., Dolino, D., Lee, G., Chatterjee, S., MacLean, D., Flatebo, C.,  
937 Landes, C., and Jayaraman, V. (2016). Stargazin Modulation of AMPA Receptors. *Cell*  
938 *Reports* *17*, 328-335.
- 939 35. Shi, Y., Lu, W., Milstein, A. D., and Nicoll, R. A. (2009). The stoichiometry of  
940 AMPA receptors and TARPs varies by neuronal cell type. *Neuron* *62*, 633-640.
- 941 36. Sobolevsky, A. I., Rosconi, M. P., and Gouaux, E. (2009). X-ray structure,  
942 symmetry and mechanism of an AMPA-subtype glutamate receptor. *Nature* *462*, 745-  
943 756.
- 944 37. Sobolevsky, A. I., Yelshansky, M. V., and Wollmuth, L. P. (2003). Different  
945 gating mechanisms in glutamate receptor and K<sup>+</sup> channels. *J Neurosci* *23*, 7559-7568.
- 946 38. Sun, Y., Olson, R., Horning, M., Armstrong, N., Mayer, M., and Gouaux, E.  
947 (2002). Mechanism of glutamate receptor desensitization. *Nature* *417*, 245-253.
- 948 39. Tajima, N., Karakas, E., Grant, T., Simorowski, N., Diaz-Avalos, R., Grigorieff,  
949 N., and Furukawa, H. (2016). Activation of NMDA receptors and the mechanism of  
950 inhibition by ifenprodil. *Nature*
- 951 40. Takatsuka, Y., and Nikaido, H. (2010). Site-directed disulfide cross-linking to  
952 probe conformational changes of a transporter during its functional cycle: Escherichia  
953 coli AcrB multidrug exporter as an example. *Methods Mol Biol* *634*, 343-354.
- 954 41. Tao, C. L., Liu, Y. T., Sun, R., Zhang, B., Qi, L., Shivakoti, S., Tian, C. L., Zhang,  
955 P., Lau, P. M., Zhou, Z. H., and Bi, G. Q. (2018). Differentiation and Characterization  
956 of Excitatory and Inhibitory Synapses by Cryo-electron Tomography and Correlative  
957 Microscopy. *J Neurosci* *38*, 1493-1510.
- 958 42. Taschenberger, H., and von Gersdorff, H. (2000). Fine-tuning an auditory  
959 synapse for speed and fidelity: developmental changes in presynaptic waveform,  
960 EPSC kinetics, and synaptic plasticity. *J Neurosci* *20*, 9162-9173.
- 961 43. Tomita, S., Adesnik, H., Sekiguchi, M., Zhang, W., Wada, K., Howe, J. R.,  
962 Nicoll, R. A., and Brecht, D. S. (2005). Stargazin modulates AMPA receptor gating and  
963 trafficking by distinct domains. *Nature* *435*, 1052-1058.
- 964 44. Twomey, E. C., Yelshanskaya, M. V., Grassucci, R. A., Frank, J., and  
965 Sobolevsky, A. I. (2017a). Channel opening and gating mechanism in AMPA-subtype  
966 glutamate receptors. *Nature*
- 967 45. Twomey, E. C., Yelshanskaya, M. V., Grassucci, R. A., Frank, J., and  
968 Sobolevsky, A. I. (2017b). Structural Bases of Desensitization in AMPA Receptor-  
969 Auxiliary Subunit Complexes. *Neuron* *94*, 569-580.e5.
- 970 46. Winn, M. D., Ballard, C. C., Cowtan, K. D., Dodson, E. J., Emsley, P., Evans,  
971 P. R., Keegan, R. M., Krissinel, E. B., Leslie, A. G. W., McCoy, A., McNicholas, S. J.,  
972 Murshudov, G. N., Pannu, N. S., Potterton, E. A., Powell, H. R., Read, R. J., Vagin,  
973 A., and Wilson, K. S. (2011). Overview of the CCP4 suite and current developments.  
974 *Acta Crystallogr D Biol Crystallogr* *67*, 235-242.
- 975 47. Xu-Friedman, M. A., and Regehr, W. G. (2003). Ultrastructural contributions to  
976 desensitization at cerebellar mossy fiber to granule cell synapses. *J Neurosci* *23*,  
977 2182-2192.
- 978 48. Yelshanskaya, M. V., Li, M., and Sobolevsky, A. I. (2014). Structure of an  
979 agonist-bound ionotropic glutamate receptor. *Science* *345*, 1070-1074.

- 980 49. Yelshanskaya, M. V., Saotome, K., Singh, A. K., and Sobolevsky, A. I. (2016).  
981 Probing Intersubunit Interfaces in AMPA-subtype Ionotropic Glutamate Receptors. *Sci*  
982 *Rep* 6, 19082.
- 983 50. Yelshansky, M. V., Sobolevsky, A. I., Jatzke, C., and Wollmuth, L. P. (2004).  
984 Block of AMPA receptor desensitization by a point mutation outside the ligand-binding  
985 domain. *Journal of Neuroscience* 24, 4728-4736.
- 986 51. Zhang, W., Devi, S. P. S., Tomita, S., and Howe, J. R. (2014). Auxiliary proteins  
987 promote modal gating of AMPA- and kainate-type glutamate receptors. *Eur J Neurosci*  
988 39, 1138-1147.
- 989 52. Zhu, S., Stein, R. A., Yoshioka, C., Lee, C. H., Goehring, A., Mchaourab, H. S.,  
990 and Gouaux, E. (2016). Mechanism of NMDA Receptor Inhibition and Activation. *Cell*  
991 165, 704-714.
- 992 53. Zuber, B., Nikonenko, I., Klauser, P., Muller, D., and Dubochet, J. (2005). The  
993 mammalian central nervous synaptic cleft contains a high density of periodically  
994 organized complexes. *Proc Natl Acad Sci U S A* 102, 19192-19197.
- 995
